# Supplementary material for: A Novel Approach on the Use of Samples from Faecal Occult Blood Screening Kits for Metabolomics Analysis: Application in Colorectal Cancer Population
Source: MDPI journal article supplement (doi:10.3390/metabo13030321), 2023-02-21
Supplement: s1 [file s1]

## Table of contents

| Page      | Description                                                                                                                                                                                                                                                                                                                   |
|-----------|-------------------------------------------------------------------------------------------------------------------------------------------------------------------------------------------------------------------------------------------------------------------------------------------------------------------------------|
| SupFile 1 | <b>Table S1.</b> Sample Information_Metadata                                                                                                                                                                                                                                                                                  |
| SupFile 2 | <b>Table S4.</b> Statistical Analysis                                                                                                                                                                                                                                                                                         |
| S4        | <b>Table S2.</b> Percentage of coefficient of coefficient of variation (% CV) of each metabolite analyzed, using a pool of samples as quality control validation sample (QC_val). CTL: control or healthy individuals; AD: adenoma patients, and CRC: colorectal cancer patients.                                             |
| S4        | <b>Table S3.</b> Percentage of coefficient of coefficient of variation (% CV) of each metabolite analyzed, using a commercial reference serum as quality control calibration sample (QC_cal). CTL: control or healthy individuals; AD: adenoma patients, and CRC: colorectal cancer patients.                                 |
| S5        | <b>Figure S1.</b> PCA-X scores plot obtained for the three studied groups ( $R^2 = 0.612$ and $Q^2 = 0.374$ ) and colored by class of Batch 2. CTL – control; AD – adenoma, and CRC – colorectal cancer individuals. Scaling and transformation were autoscaled and logarithm.                                                |
| S5        | <b>Figure S2.</b> PCA-X scores plot obtained for the three studied groups ( $R^2 = 0.612$ , and $Q^2 = 0.374$ ) and colored by gender. 0 – female, and 1 – male individuals. Scaling and transformation were autoscaled and logarithm.                                                                                        |
| S6        | <b>Figure S3.</b> PCA-X scores plot obtained for the three studied groups ( $R^2 = 0.612$ , and $Q^2 = 0.374$ ) and colored by fecal occult blood. Scaling and transformation were autoscaled and logarithm                                                                                                                   |
| S6        | <b>Figure S4.</b> PLS-DA scores plot obtained for the three studied groups ( $R^2 = 0.302$ , and $Q^2 = 0.149$ ). CTL – control; AD – adenoma, and CRC – colorectal cancer individuals. Scaling and transformation were autoscaled and logarithm.                                                                             |
| S7        | <b>Figure S5.</b> OPLS-DA scores plot obtained for control individuals (CTL) and colorectal cancer patients (CRC) groups ( $R^2 = 0.554$ , and $Q^2 = 0.276$ , CV-ANOVA $p$ -value = 0.2431). CTL – control; AD – adenoma, and CRC – colorectal cancer individuals. Scaling and transformation were autoscaled and logarithm. |
| S7        | <b>Figure S6.</b> OPLS-DA scores plot obtained for adenoma (AD) and colorectal cancer (CRC) groups ( $R^2 = 0.675$ , and $Q^2 = 0.296$ , CV-ANOVA $p$ -value = 0.1778). CTL – control; AD – adenoma, and CRC – colorectal                                                                                                     |

|           |                                                                                                                                                                                                                                                                                         |
|-----------|-----------------------------------------------------------------------------------------------------------------------------------------------------------------------------------------------------------------------------------------------------------------------------------------|
|           | cancer individuals. Scaling and transformation were autoscaled and logarithm.                                                                                                                                                                                                           |
| <b>S8</b> | <b>Figure S7.</b> PCA-X scores plot obtained for the three studied groups ( $R^2 = 0.482$ , and $Q^2 = 0.23$ ) when fusing Batch 2 and Batch 3 studies. CTL - control; AD – adenoma, and CRC – colorectal cancer individuals. Scaling and transformation were autoscaled and logarithm. |

**Table S2.** Percentage of coefficient of variation (% CV) of each metabolite analyzed, using a pool of samples as quality control validation sample (QC\_val). CTL: control or healthy individuals; AD: adenoma patients, and CRC: colorectal cancer patients.

|         | ChoE(18:1) | ChoE(18:2) | ChoE(20:4) | PE(16:0/18:1) | SM(d18:1/23:0) | SM(42:3) | TG(54:1) |
|---------|------------|------------|------------|---------------|----------------|----------|----------|
| poolCTL | 10%        | 22%        | 24%        | 20%           | 9%             | 18%      | 13%      |
| poolAD  | 7%         | 29%        | 14%        | 18%           | 12%            | 16%      | 16%      |
| poolCRC | 13%        | 21%        | 40%        | 19%           | 8%             | 11%      | 9%       |

**Table S3.** Percentage of coefficient of variation (% CV) of each metabolite analyzed, using a commercial reference serum as a quality control calibration sample (QC\_cal). CTL: control or healthy individuals; AD: adenoma patients, and CRC: colorectal cancer patients.

|         | ChoE(18:1) | ChoE(18:2) | ChoE(20:4) | PE(16:0/18:1) | SM(d18:1/23:0) | SM(42:3) | TG(54:1) |
|---------|------------|------------|------------|---------------|----------------|----------|----------|
| poolCTL | 10%        | 24%        | 21%        | 14%           | 11%            | 19%      | 18%      |
| poolAD  | 8%         | 28%        | 6%         | 7%            | 11%            | 15%      | 11%      |
| poolCRC | 12%        | 22%        | 41%        | 11%           | 8%             | 12%      | 19%      |
| QC_val  | 3%         | 5%         | 8%         | 5%            | 4%             | 5%       | 4%       |

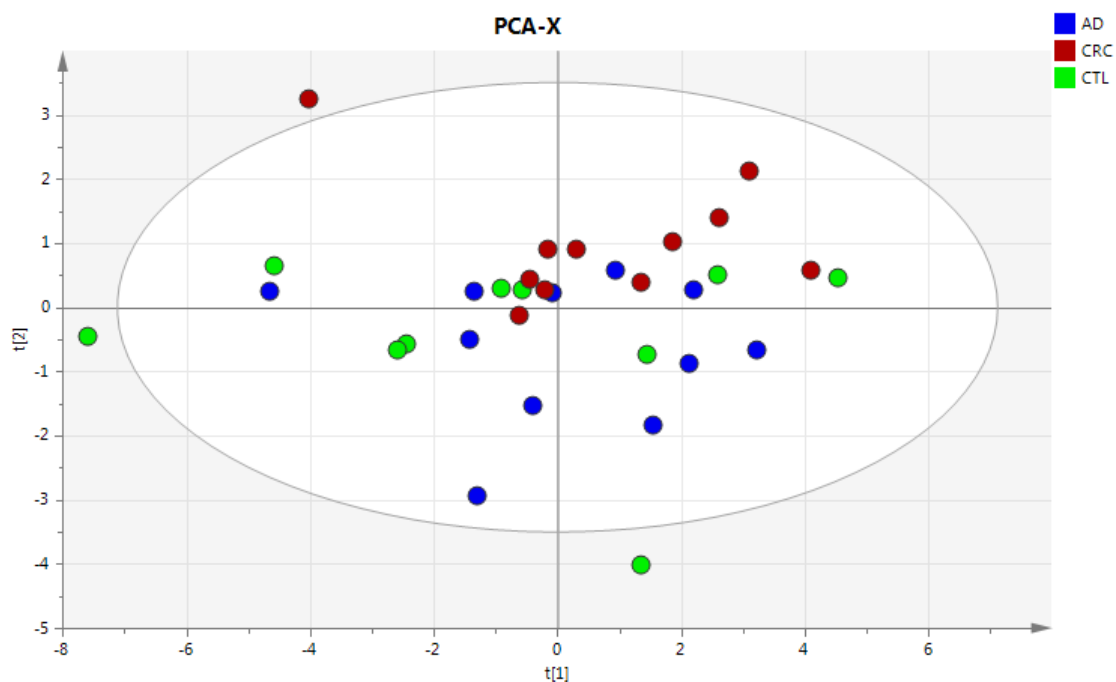

**Figure S1. PCA-X scores plot** obtained for the three studied groups ( $R^2 = 0.612$ , and  $Q^2 = 0.374$ ) and colored by class of Batch 2. CTL - control; AD – adenoma, and CRC – colorectal cancer individuals. Scaling and transformation were autoscaled and logarithm.

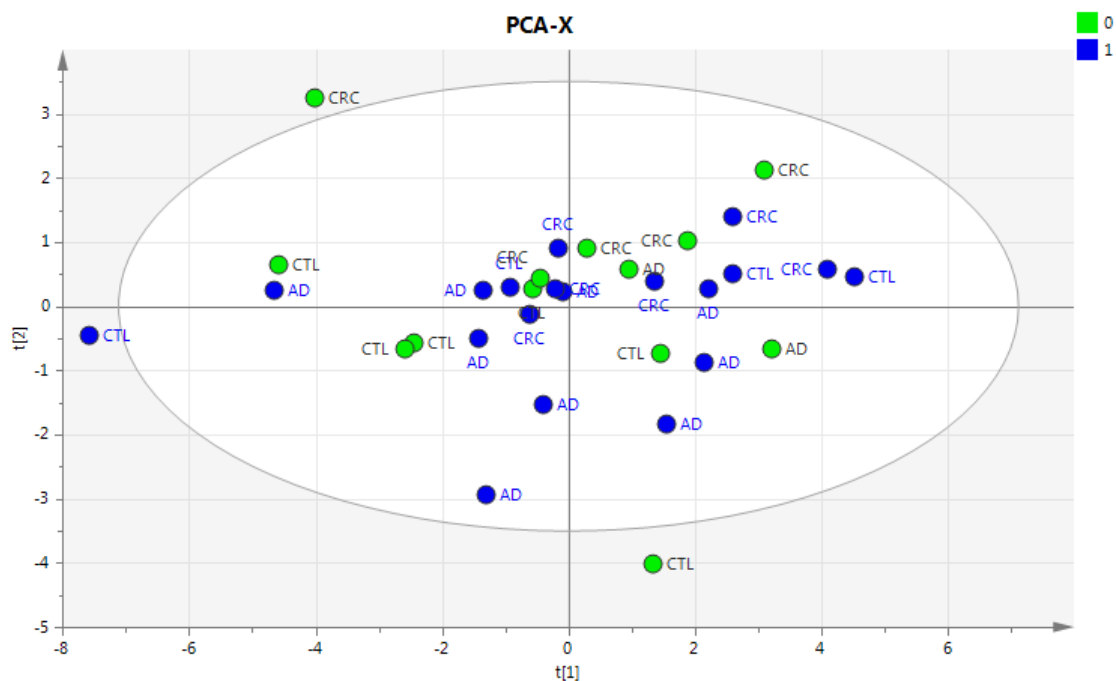

**Figure S2. PCA-X scores plot** obtained for the three studied groups ( $R^2 = 0.612$ , and  $Q^2 = 0.374$ ) and colored by gender. 0 – female, and 1 – male individuals. Scaling and transformation were autoscaled and logarithm.

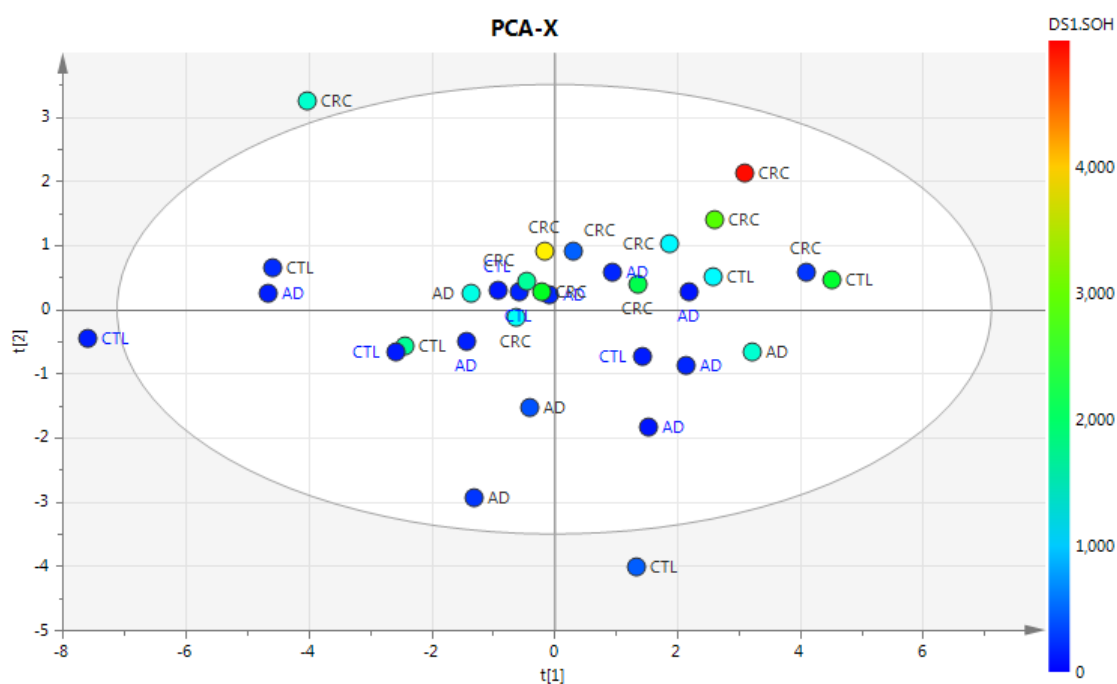

**Figure S3. PCA-X scores plot** obtained for the three studied groups ( $R^2 = 0.612$ , and  $Q^2 = 0.374$ ) and colored by fecal occult blood. Scaling and transformation were autoscaled and logarithm.

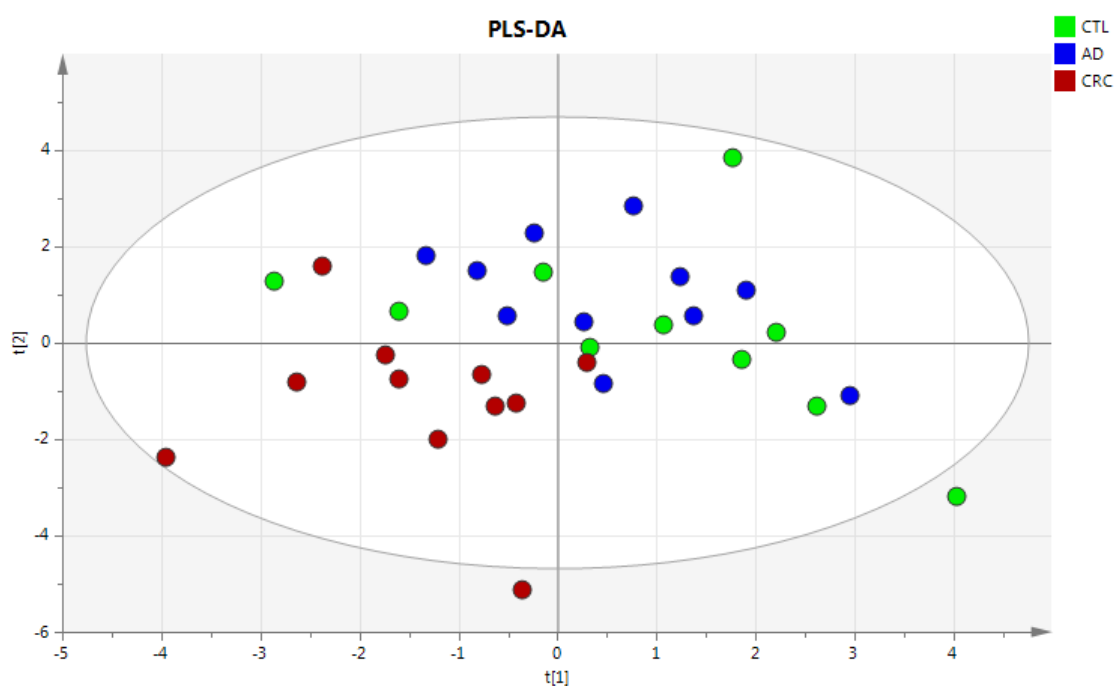

**Figure S4. PLS-DA scores plot** obtained for the three studied groups ( $R^2 = 0.302$ , and  $Q^2 = 0.149$ ). CTL - control; AD – adenoma, and CRC – colorectal cancer individuals. Scaling and transformation were autoscaled and logarithm.

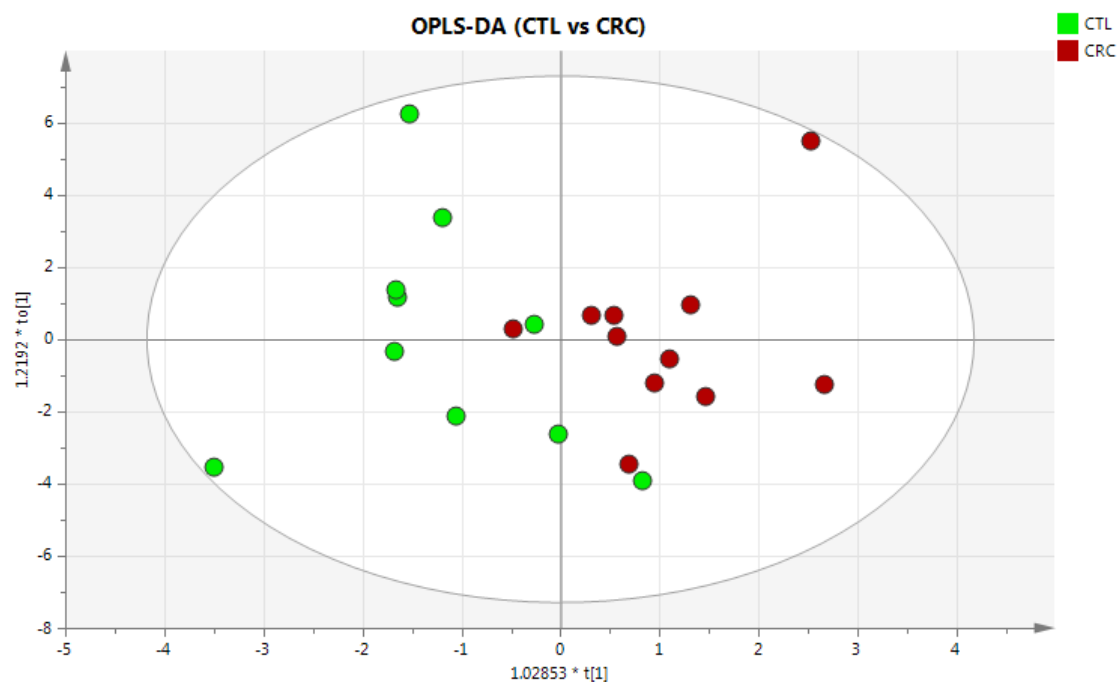

**Figure S5. OPLS-DA scores plot** obtained for control individuals (CTL) and colorectal cancer patients (CRC) groups ( $R^2 = 0.554$ , and  $Q^2 = 0.276$ ; CV-ANOVA  $p$ -value = 0.2431). CTL – control individuals, and CRC – colorectal cancer patients. Scaling and transformation were autoscaled and logarithm.

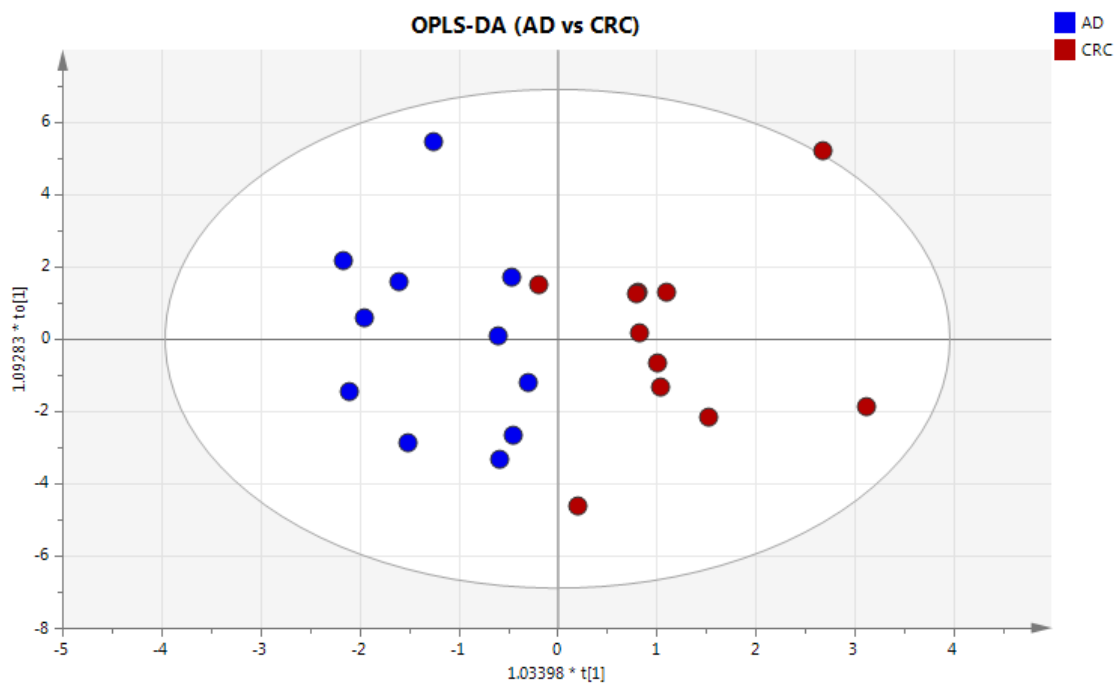

**Figure S6. OPLS-DA scores plot** obtained for adenocarcinoma (AS) and colorectal cancer (CRC) groups ( $R^2 = 0.675$ , and  $Q^2 = 0.296$ ; CV-ANOVA  $p$ -value = 0.1778). AD – adenoma, and CRC – colorectal cancer patients. Scaling and transformation were autoscaled and logarithm.

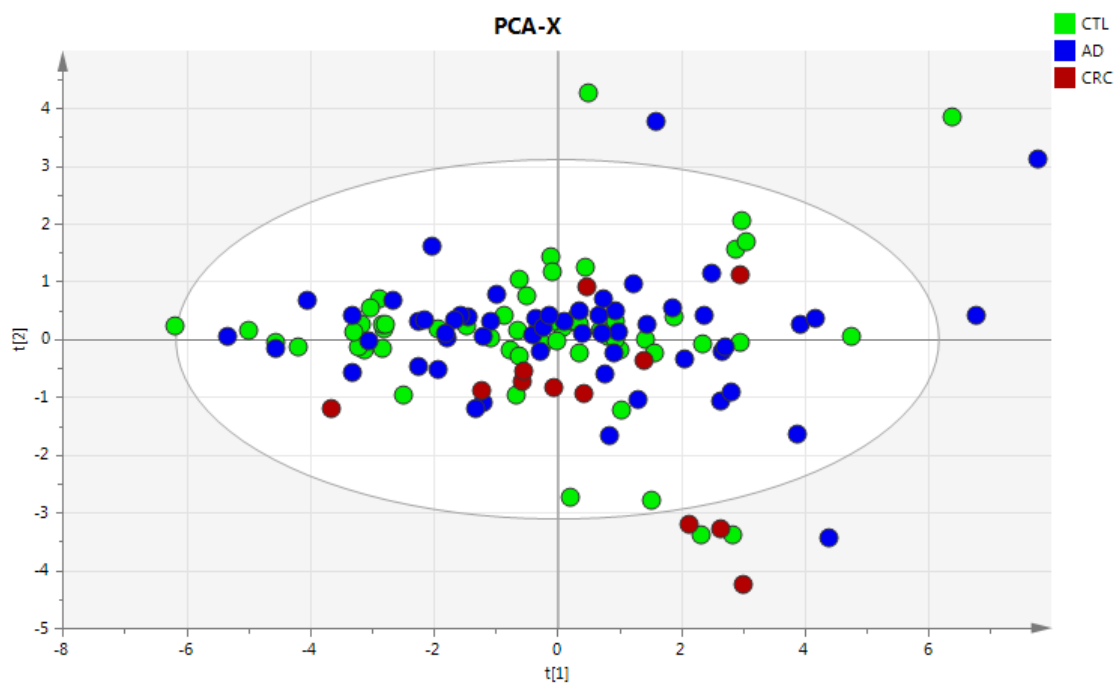

**Figure S7.** PCA-X scores plot obtained for the three studied groups ( $R^2 = 0.482$ , and  $Q^2 = 0.23$ ) when fusing Batch 2 and Batch 3 studies. CTL - control; AD – adenoma, and CRC – colorectal cancer individuals. Scaling and transformation were autoscaled and logarithm.
