# Supplementary material for: A Novel Approach on the Use of Samples from Faecal Occult Blood Screening Kits for Metabolomics Analysis: Application in Colorectal Cancer Population
Source: Metabolites. 2023 Feb 21;13(3):321. doi: 10.3390/metabo13030321 (PMC10055627; doi:10.3390/metabo13030321)
Supplement: Supplementary file 1 [file metabolites-13-00321-s001.zip › Table S1_Sample Information_Metadata.xlsx]

## Sheet: Metadata
										ChoE (16:0)	ChoE (18:1)	ChoE (18:2)	ChoE (18:3)	ChoE (20:2)	ChoE (20:4)	ChoE (20:5)	ChoE (22:4)	ChoE (22:5)	ChoE (22:6)	PE(34:1)	SM(d18:1/23:0)	SM(42:3)	TG(54:1)
SampleFileName	Hospital/Institute	Hospital ID	SAMPLE.ID	SEXO	EDAD	Batch	Group	Level	SOH (µl/l)	ChoE_03	ChoE_07	ChoE_08	ChoE_09	ChoE_10	ChoE_12	ChoE_13	ChoE_14	ChoE_15	ChoE_17	DAPE02	SphLip_23	SphLip_28	TG48
owl-1923-001	Biodonostia Health Research Institute	L95F56	CTL13	-	-	2	CTL	1	-	0.00372833	0.00312032	0.00064136	0.0136073	0.586558	0.000420449	0.00341202	0.0657873	0.0493999	0.0188356	1.64016	0.032692	0.00590179	0.160207
owl-1923-002	Biodonostia Health Research Institute	L76XFH/67.009.253	CTL14	F	24	2	CTL	1	1759	0.00498729	0.000517666	0.000202793	0.00418239	0.397455	5.67011e-06	0.000628373	0.0802513	0.0981621	0.0219973	0.761809	0.0107529	0.00218116	0.102111
owl-1923-003	Biodonostia Health Research Institute	1609455	CTL15	F	58	2	CTL	1	132	0.00126747	0.00100415	9.71773e-05	0.00755561	0.17091	0.000295801	0.00517665	0.0243693	0.0208731	0.0253795	4.69837	3.39456e-05	0.00333026	0.0178528
owl-1923-004	Biodonostia Health Research Institute	60.393.628/74777/2018.10	CTL16	M	50	2	CTL	1	111	0.00273934	0.00149299	0.000546511	0.0139459	0.22629	6.41965e-05	0.010647	0.900971	0.00792807	0.0194249	0.537104	0.0330363	0.00922127	0.0649857
owl-1923-005	Biodonostia Health Research Institute	746226	CTL17	F	60	2	CTL	1	215	0.00446593	0.00175077	0.000211233	0.00280868	0.0890799	0.000276704	2.78295e-06	0.0276214	0.000518984	0.0130927	0.702622	0.00100065	0.000504166	0.0220487
owl-1923-006	Biodonostia Health Research Institute	1367529	CTL18	M	65	2	CTL	1	2260	0.0301575	0.0653578	0.0178068	0.0185487	1.82479	0.0116017	0.0146169	4.26456	1.40787	0.106729	3.79816	0.0020438	0.00205942	0.239298
owl-1923-007	Biodonostia Health Research Institute	1794197	CTL19	F	68	2	CTL	1	137	0.00442845	0.00649134	0.00314046	0.0184217	0.422604	0.00241159	0.01116	0.558178	0.412446	0.0364628	3.62811	0.00144215	0.00180003	0.270729
owl-1923-008	Biodonostia Health Research Institute	499564	CTL20	M	70	2	CTL	1	1237	0.0134248	0.00785642	0.00613552	0.0169241	2.44801	0.00325554	0.0516403	0.317005	0.0430027	0.0646617	1.829	0.00581734	0.0123854	0.239481
owl-1923-009	Biodonostia Health Research Institute	328410	CTL21	F	55	2	CTL	1	456	0.00997833	0.00286844	0.00314555	0.00607801	1.29117	1.57353e-05	0.0672236	1.67056	0.730895	0.0292407	5.24774	0.000205639	0.00241076	8.14283
owl-1923-010	Biodonostia Health Research Institute	2016696	CTL22	M	63	2	CTL	1	142	0.000716867	0.000474639	0.000112547	0.00250403	0.0698757	0.000117734	2.56616e-05	0.000435148	0.00048548	0.00066915	0.144616	0.000366907	6.0914e-05	0.166448
owl-1923-013	Biodonostia Health Research Institute	732612	CTL25	F	65	2	CTL	1	169	0.00373488	0.00427558	0.000610866	0.00531074	0.233292	0.000779229	0.0423867	0.144335	0.15894	0.0387452	0.837036	0.000840262	0.00312742	0.0482888
owl-1923-016	Biodonostia Health Research Institute	506393	AD21	M	64	2	AD	2	143	0.00402864	0.000519495	9.59688e-05	0.00374832	0.123529	6.73114e-05	5.5659e-05	0.0201247	0.000792807	0.00666331	0.600758	0.00402859	0.00111016	0.0341465
owl-1923-017	Biodonostia Health Research Institute	1613275	AD22	F	56	2	AD	2	1472	0.0184281	0.0253087	0.00747832	0.0172494	1.77903	0.00123669	0.0409639	1.60402	0.36917	0.0469561	3.17003	0.00346048	0.00209189	0.657168
owl-1923-018	Biodonostia Health Research Institute	91276	AD23	M	63	2	AD	2	399	0.00283476	0.00327449	0.000652396	0.00582908	0.563966	0.000589122	0.00415481	0.207512	0.0829084	0.0209443	10.3495	0.000429344	0.00222307	0.131093
owl-1923-019	Biodonostia Health Research Institute	1710056	AD24	M	62	2	AD	2	101	0.00788799	0.00614474	0.00190136	0.0197199	1.52826	0.00239344	0.0935709	0.431375	0.267305	0.277485	1.96424	0.000951537	0.00524338	0.0579409
owl-1923-020	Biodonostia Health Research Institute	11220077	AD25	M	55	2	AD	2	100	0.00696045	0.0104798	0.00229094	0.0115952	5.90963	0.000195692	0.00175996	0.57033	0.118313	0.0141692	4.84726	0.0117267	0.00693772	0.633457
owl-1923-021	Biodonostia Health Research Institute	524047	AD26	M	61	2	AD	2	190	0.0078851	0.00697936	0.00107239	0.00557741	0.328135	0.00135672	0.00166509	0.618942	0.231337	0.0267125	0.78137	0.0024433	0.00198213	0.081167
owl-1923-022	Biodonostia Health Research Institute	1387765	AD27	F	59	2	AD	2	182	0.00524904	0.00799538	0.000919976	0.0087988	0.713559	0.00134332	0.0598745	0.0762489	0.119854	0.277639	1.83848	0.00102654	0.00544804	0.0367495
owl-1923-023	Biodonostia Health Research Institute	336981	AD28	M	53	2	AD	2	156	0.00841241	0.00379573	0.000404112	0.00329702	0.145292	0.000434893	0.00155179	0.214684	0.0372091	0.0144326	3.82235	0.00152806	0.0010003	0.0583842
owl-1923-024	Biodonostia Health Research Institute	2356940	AD29	M	53	2	AD	2	263	0.000529225	0.00267785	0.00102259	0.00229699	1.00199	0.000120394	0.0478961	0.186747	0.0335143	0.0400816	3.44977	0.00196667	0.000417792	1.69851
owl-1923-025	Biodonostia Health Research Institute	2281737	AD30	M	64	2	AD	2	180	0.0180597	0.0158015	0.00270282	0.0119184	0.341646	0.00325659	0.00962368	2.39304	0.606309	0.054009	2.37738	0.000504515	0.00155843	0.679114
owl-1923-026	Biodonostia Health Research Institute	955419	AD31	M	60	2	AD	2	1374	0.00384145	0.00288665	0.000321324	0.00344007	0.065688	0.000545994	0.0065023	0.126065	0.09685	0.0315302	1.48427	0.00120347	0.00222732	0.0927254
owl-1923-031	Biodonostia Health Research Institute	2044462	CRC11	M	55	2	CRC	3	2330	0.00177775	0.00337521	0.00216839	0.0069304	0.90537	0.00128204	0.00730892	0.138915	0.0866838	0.0262687	1.17312	0.00131084	0.00235577	0.103593
owl-1923-032	Biodonostia Health Research Institute	955326	CRC12	F	60	2	CRC	3	1739	0.00566629	0.00356996	0.00197198	0.00707069	0.946199	0.00145103	0.00613431	0.0268266	0.105386	0.0177611	0.590309	0.000799797	0.001588	0.156446
owl-1923-033	Biodonostia Health Research Institute	772722	CRC13	M	50	2	CRC	3	254	0.00918082	0.0161781	0.00288265	0.0148071	0.348438	0.0140809	0.77939	3.13459	6.11143	0.761452	2.47009	0.0228612	0.00340591	0.232137
owl-1923-034	Biodonostia Health Research Institute	1147508	CRC14	F	65	2	CRC	3	1492	0.00283961	0.00154764	0.000522685	0.00315202	0.00145026	0.00127757	0.00310724	0.000680151	0.0132092	0.0307698	0.223909	0.00151313	0.00101414	0.0166346
owl-1923-036	Biodonostia Health Research Institute	1366383	CRC17	F	66	2	CRC	3	1226	0.00931713	0.0107082	0.00474331	0.00826002	1.05579	0.00560649	0.0359627	0.0990461	0.0404283	0.0583381	4.50211	0.00598587	0.0107123	0.0527275
owl-1923-037	Biodonostia Health Research Institute	294533	CRC18	M	67	2	CRC	3	1287	0.00228924	0.00219604	0.00145447	0.00814551	0.194677	0.000349814	0.00210357	0.184281	0.13183	0.0125851	3.07463	0.00532811	0.00336851	0.077283
owl-1923-038	Biodonostia Health Research Institute	77259	CRC19	M	67	2	CRC	3	2912	0.0113433	0.0141894	0.00374863	0.0129322	0.214263	0.00887716	0.0257213	0.933664	0.34326	0.0389216	2.26152	0.00856784	0.00843982	0.196887
owl-1923-039	Biodonostia Health Research Institute	502203	CRC20	M	69	2	CRC	3	2120	0.00761244	0.00670405	0.00815869	0.00796232	0.768985	0.00681033	0.0380767	0.138901	0.107927	0.0692866	2.76448	0.000288977	0.00110153	0.12241
owl-1923-040	Biodonostia Health Research Institute	547162	CRC21	M	54	2	CRC	3	3819	0.0104202	0.00796827	0.00293792	0.00508142	1.16691	0.000660686	0.00361144	0.145599	0.0199888	0.0315144	1.05079	0.000743646	0.000459254	0.0612635
owl-1923-041	Biodonostia Health Research Institute	1404652	CRC22	F	54	2	CRC	3	4943	0.010489	0.00948422	0.01051	0.019369	0.87181	0.00711896	0.055521	0.214048	0.182663	0.0627423	1.78468	0.00682753	0.00986788	0.156006
owl-1923-042	Biodonostia Health Research Institute	90555	CRC23	F	62	2	CRC	3	471	0.00769533	0.0073329	0.00320443	0.00607544	0.369238	0.00244348	0.0299907	0.0672698	0.0504976	0.0295406	1.03071	0.00320106	0.00328341	0.067059
owl-2124-001	Biodonostia Health Research Institute	985524	985524	M	53	3	CTL	1	294	0.00323707	0.00278182	0.00123586	0.00380406	0.710043	0.000805097	0.00440262	0.0670612	0.0671277	0.017704	0.437674	0.000541555	0.000326448	0.0751968
owl-2124-002	Biodonostia Health Research Institute	2541654	2541654	M	60	3	CTL	1	470	0.00861261	0.0129505	0.00324885	0.00727329	0.378917	0.00585237	0.00614405	0.580754	0.157536	0.0175937	5.65178	0.000716214	0.00177648	0.146143
owl-2124-003	Biodonostia Health Research Institute	936074	936074	M	69	3	CTL	1	906	0.00748343	0.00916044	0.00206149	0.00385493	0.204517	0.00360142	0.00561725	0.648837	0.214716	0.0217214	3.41115	0.00263152	0.00131401	0.0513604
owl-2124-004	Biodonostia Health Research Institute	1197371	1197371	M	53	3	CTL	1	525	0.0124427	0.00925677	0.00214479	0.00496215	0.211279	0.00280893	0.0124797	0.98802	0.252975	0.117121	1.66444	0.00285288	0.000691965	0.244815
owl-2124-005	Biodonostia Health Research Institute	2062885	2062885	M	51	3	CTL	1	274	0.0140508	0.0416275	0.0120934	0.0269755	2.51955	0.00568844	0.0101578	0.694179	0.3234	0.0472793	5.52488	0.00217141	0.00159702	0.382035
owl-2124-006	Biodonostia Health Research Institute	1210324	1210324	F	51	3	CTL	1	336	0.00980653	0.0106212	0.00145075	0.00686131	0.531297	0.00195395	0.00311716	0.509402	0.164627	0.0252787	0.498523	0.000431936	0.000200886	0.128676
owl-2124-007	Biodonostia Health Research Institute	529208	529208	F	61	3	CTL	1	106	0.00085546	0.00214881	0.00273464	0.0101276	0.549037	0.00108807	0.0189518	0.0912743	0.33803	0.0908325	0.820155	0.00236925	0.000953511	1.34473
owl-2124-008	Biodonostia Health Research Institute	961163	961163	F	61	3	CTL	1	142	0.00287499	0.00498018	0.00327489	0.0105749	1.06455	0.00111486	0.00667131	0.157774	0.047037	0.0362858	1.40448	0.000703068	0.000367838	2.54003
owl-2124-009	Biodonostia Health Research Institute	296225	296225	M	69	3	CTL	1	340	0.00337633	0.000407126	0.000143301	0.000859371	0.197627	0.000218635	0.000452727	0.000735011	0.00518984	0.00467504	0.112534	0.000811704	0.0002451	0.00954189
owl-2124-010	Biodonostia Health Research Institute	761114	761114	M	58	3	CTL	1	185	0.00185498	0.00256968	0.000721572	0.00230395	0.303081	0.000366782	0.000256616	0.0164308	0.000650196	0.00940889	0.384071	0.00069287	0.000298102	0.0836565
owl-2124-011	Biodonostia Health Research Institute	953867	953867	M	62	3	CTL	1	101	0.00929605	0.0156548	0.00416015	0.0364091	0.901533	0.0018224	0.0157362	0.84541	0.401601	0.0711475	1.68869	0.00232076	0.000623665	0.117936
owl-2124-012	Biodonostia Health Research Institute	2004875	2004875	F	69	3	CTL	1	526	0.00174076	0.000754748	0.000785783	0.00167079	0.0703922	0.00110059	0.00164745	0.0114523	0.000675196	0.0127715	0.481939	0.00130621	0.000910977	0.0410687
owl-2124-013	Biodonostia Health Research Institute	777110	777110	F	53	3	CTL	1	296	0.0125796	0.0102722	0.00361345	0.00494381	0.215608	0.00377317	0.0155486	0.169497	0.352752	0.0747214	1.08303	0.00508733	0.00400255	0.0500369
owl-2124-014	Biodonostia Health Research Institute	2038131	2038131	M	59	3	CTL	1	386	0.0168222	0.023382	0.00657695	0.0273741	1.00759	0.0035702	0.00482217	0.564623	0.745201	0.0330829	1.4802	0.00357936	0.00113508	0.0321671
owl-2124-015	Biodonostia Health Research Institute	1846118	1846118	F	53	3	CTL	1	9026	0.0144562	0.0169291	0.00305672	0.00468347	0.880314	0.00429884	0.0110596	0.284628	0.144855	0.0404045	1.94699	0.000636713	0.00170666	0.101845
owl-2124-016	Biodonostia Health Research Institute	1924444	1924444	M	57	3	CTL	1	131	0.000680276	0.00171633	0.000535181	0.00242746	0.232665	0.000883321	0.00103341	0.100908	0.0564454	0.0248614	1.40033	0.00171694	0.00133686	0.0907637
owl-2124-017	Biodonostia Health Research Institute	987992	987992	F	54	3	CTL	1	333	0.00186139	0.000651959	0.00082889	0.000809233	0.80373	0.00240314	0.0226505	0.626267	0.38132	0.143789	4.23586	0.0221962	0.000961972	0.273554
owl-2124-018	Biodonostia Health Research Institute	1195060	1195060	M	54	3	CTL	1	574	0.00949862	0.0109451	0.00173713	0.00357965	0.283878	0.00494565	0.113126	4.44067	0.997499	0.607587	2.0412	0.00102485	0.00115784	0.338967
owl-2124-019	Biodonostia Health Research Institute	536115	536115	M	59	3	CTL	1	723	0.00538772	0.00774606	0.00152862	0.00982812	0.50844	0.000655967	0.0033537	0.174533	0.10337	0.0232564	8.03221	0.00204645	0.00155675	0.0517289
owl-2124-020	Biodonostia Health Research Institute	558504	558504	F	53	3	CTL	1	356	0.00680883	0.0229244	0.00231585	0.00969859	0.282784	0.00482179	0.00998781	0.319686	0.532807	0.0208025	13.5966	0.0274478	0.00591501	0.111931
owl-2124-021	Biodonostia Health Research Institute	1386673	1386673	F	61	3	CTL	1	1356	0.00905939	0.011836	0.00218173	0.0062936	11.7967	0.00247048	0.00530542	0.233937	0.0514348	0.0561746	2.05453	0.0015663	0.000742612	0.04844
owl-2124-022	Biodonostia Health Research Institute	97455	97455	F	64	3	CTL	1	203	0.00171951	0.00311818	0.00376672	0.00532066	0.371094	0.000966845	0.0423942	0.019439	0.0748095	0.0410204	1.01756	0.00181612	0.00125928	0.842936
owl-2124-023	Biodonostia Health Research Institute	92079	92079	F	66	3	CTL	1	104	0.0028583	0.00644454	0.00188451	0.00346368	1.05585	0.000919494	0.0100988	0.922143	0.490213	0.0095941	4.30063	0.00027227	0.000673135	0.299961
owl-2124-024	Biodonostia Health Research Institute	966024	966024	F	59	3	CTL	1	405	0.00528957	0.00546949	0.000841867	0.00285074	0.121369	0.000879457	0.00192357	0.190944	0.169196	0.0201105	0.576752	0.000391545	0.000334544	0.0363537
owl-2124-025	Biodonostia Health Research Institute	1810325	1810325	M	62	3	CTL	1	131	0.0133812	0.00845631	0.00184481	0.0058589	0.736377	0.00227621	0.00897428	0.703581	0.188431	0.0297115	2.95302	0.00278693	0.000716018	0.0682494
owl-2124-026	Biodonostia Health Research Institute	991615	991615	M	58	3	CTL	1	718	0.00145437	0.00113462	0.000342288	0.00158732	0.128785	0.000766228	0.0155018	0.0359216	0.0206309	0.0476737	0.643718	0.000258557	0.00087497	0.275391
owl-2124-027	Biodonostia Health Research Institute	10831001	10831001	M	68	3	CTL	1	181	0.00450648	0.0061313	0.00138781	0.00728459	6.63461	0.00231777	0.00285654	0.461812	0.164146	0.0143842	3.7533	0.000610664	0.00174639	0.116958
owl-2124-028	Biodonostia Health Research Institute	1594901	1594901	F	63	3	CTL	1	135	0.00540308	0.00599626	0.00139728	0.00277004	0.0684614	0.00151937	0.0253998	1.34161	0.950751	0.229032	2.17536	0.000787768	0.000538068	0.0453491
owl-2124-029	Biodonostia Health Research Institute	743863	743863	F	63	3	CTL	1	115	0.00809119	0.0107681	0.00246927	0.00361244	0.566514	0.00279673	0.00803576	0.314425	0.103005	0.0234209	2.60954	0.000547739	0.000585318	0.102941
owl-2124-030	Biodonostia Health Research Institute	2338596	2338596	F	67	3	CTL	1	123	0.00404389	0.00172862	0.000486246	0.00422189	0.361457	0.00014502	0.00176023	0.000680151	0.0212959	0.00787609	1.34574	0.00117424	0.00059243	0.104561
owl-2124-031	Biodonostia Health Research Institute	2013402	2013402	M	67	3	CTL	1	163	0.00533687	0.0077333	0.00438984	0.0106189	1.54438	0.00391642	0.123651	1.399	1.61026	0.14108	4.5667	0.00379676	0.00224503	2.59774
owl-2124-032	Biodonostia Health Research Institute	1799022	1799022	F	66	3	CTL	1	265	0.00447517	0.00711425	0.00187444	0.0081386	0.560906	0.00149571	0.00753185	0.151061	0.0619112	0.0385666	4.63639	0.00214557	0.00170373	0.0868591
owl-2124-033	Biodonostia Health Research Institute	2005708	2005708	M	70	3	CTL	1	160	0.0107276	0.017009	0.0112198	0.0130922	1.26694	0.00166916	0.00317359	0.266944	0.0829191	0.0306752	2.09885	0.00200515	0.00186989	0.495949
owl-2124-034	Biodonostia Health Research Institute	1390400	1390400	F	61	3	CTL	1	133	0.00129164	0.00202113	0.000612584	0.00175367	0.458954	0.000375067	0.00218009	0.0434871	0.0390466	0.00826488	1.36116	0.00028596	0.000149291	0.104435
owl-2124-035	Biodonostia Health Research Institute	10186169	10186169	F	54	3	CTL	1	128	0.0147781	0.0221524	0.0085476	0.00864384	4.46385	0.00251111	0.00251624	0.255285	0.182771	0.0270897	1.22492	0.00394018	0.00120521	0.146999
owl-2124-036	Biodonostia Health Research Institute	732528	732528	M	66	3	CTL	1	217	0.00226807	0.00392693	0.00166929	0.00787906	2.09923	0.000260263	0.00422118	0.0736906	0.0255531	0.0277439	3.09462	0.0101152	0.00276777	3.87841
owl-2124-037	Biodonostia Health Research Institute	1823761	1823761	M	60	3	CTL	1	143	0.0224542	0.0459756	0.026753	0.0137282	1.6162	0.0102375	0.233224	3.65928	2.93457	0.102523	42.3722	0.00162632	0.000429868	1.85106
owl-2124-038	Biodonostia Health Research Institute	1161733	1161733	F	65	3	CTL	1	3368	0.00444637	0.00243967	0.000744263	0.00174262	0.0232645	0.00136528	0.0039592	0.0103487	0.0130832	0.0118533	0.400663	0.000196374	9.18905e-05	0.017479
owl-2124-039	Biodonostia Health Research Institute	951519	951519	F	65	3	CTL	1	400	0.00381887	0.00383181	0.000694082	0.00156603	0.190263	0.000695505	0.00346722	0.108797	0.027813	0.027558	0.236611	0.000105424	0.00108333	0.0296917
owl-2124-040	Biodonostia Health Research Institute	307866	307866	F	65	3	CTL	1	256	0.00228697	0.00123868	0.000498333	0.00245848	0.425109	0.000301665	0.000826488	0.037771	0.0125057	0.0030613	0.141013	0.000738649	0.000405141	0.339852
owl-2124-041	Biodonostia Health Research Institute	298343	298343	M	68	3	CTL	1	199	0.00919977	0.00764706	0.0020342	0.00802002	0.526676	0.00191165	0.00541355	0.300191	0.0795204	0.044403	4.1863	0.0010365	0.000692464	0.0704659
owl-2124-042	Biodonostia Health Research Institute	1282048	1282048	F	67	3	CTL	1	234	0.00480049	0.00464913	0.000757326	0.00239329	0.232526	0.00133891	0.028572	0.595929	0.273942	0.152618	7.4427	0.00403466	0.00192919	0.0568405
owl-2124-043	Biodonostia Health Research Institute	977191	977191	F	57	3	CTL	1	202	0.00400271	0.00211334	0.000512134	0.0016066	0.0296729	0.000861943	0.00121089	0.0498849	0.0232835	0.0119251	1.13574	0.00190852	0.000558691	0.11742
owl-2124-044	Biodonostia Health Research Institute	1807652	1807652	F	65	3	CTL	1	385	0.00970228	0.00638692	0.00381678	0.00443544	0.61282	0.0031398	0.00243446	0.202007	0.0612735	0.00846893	12.3272	0.00100074	0.0010067	0.263501
owl-2124-045	Biodonostia Health Research Institute	1630987	1630987	M	54	3	CTL	1	320	0.00416932	0.00240303	0.00130827	0.00399138	0.196391	0.00239866	0.00789909	0.116735	0.0767498	0.0210329	1.2059	0.00202471	0.000346367	0.208031
owl-2124-046	Biodonostia Health Research Institute	2006704	2006704	F	70	3	CTL	1	127	0.0128411	0.0161955	0.00341397	0.0115949	0.362016	0.00490906	0.0946409	1.27861	1.40748	0.283633	3.83585	0.000128154	0.00048447	0.178948
owl-2124-047	Biodonostia Health Research Institute	1812171	1812171	F	63	3	CTL	1	416	0.00192978	0.00379281	0.00164059	0.00705733	0.463285	0.00123806	0.0179501	0.130707	0.11671	0.0288476	1.06657	0.00192857	0.0014697	0.304473
owl-2124-048	Biodonostia Health Research Institute	2036694	2036694	M	60	3	CTL	1	293	0.00425908	0.00499549	0.00159536	0.00431374	0.227404	0.00196553	0.0091973	0.0737991	0.0842253	0.0406142	1.02119	0.00520084	0.000968399	0.379899
owl-2124-049	Biodonostia Health Research Institute	79846	79846	F	70	3	CTL	1	6360	0.00480033	0.00473946	0.00206519	0.00270516	0.117111	0.00487926	0.0132417	0.175926	0.122596	0.0316006	0.610361	0.00470772	0.00363612	0.182031
owl-2124-050	Biodonostia Health Research Institute	11948655	11948655	M	52	3	CTL	1	138	0.00104311	0.001082	0.000249216	0.00397583	0.0729149	0.000230492	2.78295e-05	0.0146279	0.0048548	0.00480024	0.50112	0.00129774	0.000573411	0.0290729
owl-2124-051	Biodonostia Health Research Institute	1389134	1389134	F	62	3	CTL	1	581	0.00631834	0.00375017	0.000823785	0.000936043	1.2614	0.000323666	0.000299974	0.00435148	0.00650196	0.00693277	3.0711	0.000296909	0.000233399	0.126872
owl-2124-052	Biodonostia Health Research Institute	1163098	1163098	F	64	3	AD	2	178	0.0345671	0.136995	0.0220492	0.0315863	1.92192	0.0317999	0.273258	8.14135	3.48409	0.519712	0.880993	0.000491736	4.87395e-13	0.115682
owl-2124-053	Biodonostia Health Research Institute	2263651	2263651	M	50	3	AD	2	220	0.00667241	0.00845089	0.00172929	0.00643219	0.891419	0.0014365	0.00796223	0.212171	0.137086	0.056762	5.39937	0.000971198	0.000666849	0.0885913
owl-2124-054	Biodonostia Health Research Institute	1592587	1592587	F	64	3	AD	2	435	0.00154996	0.00540287	0.00279034	0.0416714	23.3066	0.00498759	0.0423727	0.34394	0.536669	0.298741	1.04347	0.000392517	0.0036497	1.63149
owl-2124-055	Biodonostia Health Research Institute	776406	776406	M	53	3	AD	2	307	0.00791836	0.00825863	0.0032509	0.0187409	0.85014	0.00235518	0.00712807	0.462529	0.0961387	0.050445	0.611988	0.00318711	0.00102142	0.117543
owl-2124-056	Biodonostia Health Research Institute	1360956	1360956	F	71	3	AD	2	258	0.0188316	0.0351226	0.00662806	0.0255038	1.94832	0.00236632	0.0148648	0.908897	0.307501	0.056542	1.30798	0.00264471	0.00216911	0.0802025
owl-2124-057	Biodonostia Health Research Institute	1497237	1497237	F	50	3	AD	2	106	0.000781879	0.00122381	0.000479969	0.000688366	0.128808	0.000293634	2.99974e-05	0.000870295	0.00675196	0.00301029	1.42695	0.000954579	0.000414423	0.203428
owl-2124-058	Biodonostia Health Research Institute	1367640	1367640	F	69	3	AD	2	293	0.00294455	0.00504399	0.00487072	0.00880532	1.90934	0.00242087	0.045458	1.33667	0.596316	0.0235222	5.1623	0.000386285	0.000189333	6.59055
owl-2124-059	Biodonostia Health Research Institute	940202	940202	F	67	3	AD	2	228	0.0396072	0.0805585	0.0228049	0.0381785	2.95444	0.0114828	0.105586	14.9793	2.4854	0.174975	0.882916	0.0167145	0.00129978	0.383452
owl-2124-060	Biodonostia Health Research Institute	1610352	1610352	F	58	3	AD	2	207	0.00618064	0.00247086	0.000555026	0.00138324	0.0360931	0.000723449	0.00147952	0.0011153	0.00962734	0.00792708	0.340924	0.00299172	0.000314801	0.0121481
owl-2124-061	Biodonostia Health Research Institute	82884	82884	F	69	3	AD	2	396	0.00798605	0.00783811	0.00123388	0.00364341	0.211761	0.00206125	0.00389949	0.397954	0.158706	0.029673	1.4312	0.000362149	0.000238779	0.0607593
owl-2124-062	Biodonostia Health Research Institute	972161	972161	M	58	3	AD	2	189	0.007385	0.0143824	0.00246365	0.00927295	1.36828	0.0015863	0.00804962	0.250734	0.273224	0.0198908	11.1959	0.00037927	0.0018386	0.519225
owl-2124-063	Biodonostia Health Research Institute	727296	727296	M	67	3	AD	2	515	0.00465466	0.00602885	0.000908296	0.0018684	0.0858923	0.00164775	0.0113903	0.725188	0.300324	0.0763556	6.41054	0.0034069	0.00187944	0.152453
owl-2124-064	Biodonostia Health Research Institute	310459	310459	M	64	3	AD	2	319	0.00477685	0.00442939	0.00132591	0.00146836	0.187547	0.00202406	0.000497752	0.234591	0.0738654	0.00931171	6.29861	0.000478735	0.000477046	0.292134
owl-2124-065	Biodonostia Health Research Institute	302623	302623	M	67	3	AD	2	949	0.00540621	0.0074512	0.00191073	0.00467261	0.240607	0.00313608	0.058436	0.34166	0.413798	0.131351	0.876089	0.000330714	0.000767707	0.0843619
owl-2124-066	Biodonostia Health Research Institute	2037554	2037554	M	58	3	AD	2	266	0.00262371	0.0030906	0.000768844	0.00179132	0.131203	0.000627281	0.00416111	0.0709882	0.0705562	0.0120733	1.79987	0.00162941	9.15456e-05	0.0528287
owl-2124-067	Biodonostia Health Research Institute	2021830	2021830	M	63	3	AD	2	227	0.0121636	0.0122726	0.00230357	0.00601959	0.184972	0.00374991	0.0109016	1.19997	0.3913	0.0534833	1.08601	0.00118174	0.001096	0.0395773
owl-2124-068	Biodonostia Health Research Institute	2032652	2032652	M	59	3	AD	2	290	0.0144528	0.035347	0.0151746	0.0195272	1.94862	0.00802151	0.0833121	1.25656	0.705693	0.127528	6.27863	0.0021825	0.00296724	0.667818
owl-2124-069	Biodonostia Health Research Institute	962486	962486	M	61	3	AD	2	290	0.00512067	0.0121735	0.00337566	0.0119153	1.05672	0.00281124	0.00815301	0.226179	0.0906645	0.0240891	1.92461	0.00153363	0.000889055	0.255705
owl-2124-070	Biodonostia Health Research Institute	972267	972267	M	57	3	AD	2	290	0.00864469	0.0171359	0.00967272	0.011265	0.863433	0.00960419	0.0210169	1.56184	0.634824	0.0347007	2.95319	0.000503653	0.000806353	0.0581108
owl-2124-071	Biodonostia Health Research Institute	1376052	1376052	M	65	3	AD	2	195	0.00251607	0.00600608	0.00407431	0.0103255	1.13249	0.00123109	0.0701823	0.181566	0.172161	0.226004	9.85599	0.00429126	0.00178272	1.30876
owl-2124-072	Biodonostia Health Research Institute	508869	508869	M	70	3	AD	2	982	0.00740049	0.0042928	0.0015439	0.00250863	0.0145026	0.00223743	0.00490312	0.0420016	0.129754	0.0169266	1.32855	0.00213641	0.00285707	0.0421236
owl-2124-073	Biodonostia Health Research Institute	745235	745235	F	61	3	AD	2	110	0.00625844	0.00880113	0.00200882	0.0098766	37.2306	0.00171035	0.00303329	0.268236	0.113921	0.030996	1.71434	0.000669355	0.000491647	0.089027
owl-2124-074	Biodonostia Health Research Institute	2137670	2137670	F	67	3	AD	2	589	0.0065446	0.00341784	0.000802199	0.00139572	0.30277	0.000397275	0.00395613	0.219282	0.203987	0.0237635	0.975544	0.000389448	0.00101037	0.0952776
owl-2124-075	Biodonostia Health Research Institute	536016	536016	M	61	3	AD	2	499	0.0146887	0.0283962	0.00460663	0.00928749	0.686216	0.00605945	0.00937714	0.576793	0.208036	0.0481315	21.7299	0.0096703	0.00370466	0.112136
owl-2124-076	Biodonostia Health Research Institute	348275	348275	F	52	3	AD	2	809	0.027298	0.0561037	0.0166427	0.0350224	1.31903	0.00789269	0.02313	0.810141	0.149588	0.0622367	6.1838	0.016718	0.00748331	0.0515892
owl-2124-077	Biodonostia Health Research Institute	991383	991383	M	53	3	AD	2	193	0.00297038	0.00304945	0.0007361	0.00448479	0.351546	0.000935558	0.00930811	0.156204	0.64206	0.073802	1.18007	0.000975766	0.000349493	0.0694954
owl-2124-078	Biodonostia Health Research Institute	1598550	1598550	M	63	3	AD	2	109	0.000734269	0.00126016	0.000472914	0.00153805	0.302269	0.000333985	0.00348048	0.02977	0.0213486	0.0195692	1.55438	0.0011429	0.00124769	0.0649036
owl-2124-079	Biodonostia Health Research Institute	562444	562444	F	51	3	AD	2	173	0.00424912	0.0160076	0.00256415	0.00292326	0.388664	0.00102389	0.00545168	0.463187	0.138199	0.0257979	3.17309	0.000288504	0.00125366	0.0266364
owl-2124-080	Biodonostia Health Research Institute	1603525	1603525	F	61	3	AD	2	181	0.00448027	0.00780658	0.00207838	0.00643145	1.89196	0.00086616	0.00163141	0.360056	0.11493	0.0207307	6.35266	0.00254897	0.000730843	0.10932
owl-2124-081	Biodonostia Health Research Institute	2020954	2020954	F	65	3	AD	2	194	0.0023403	0.00258352	0.00117018	0.00341041	0.378415	0.000936717	0.00838626	0.0268174	0.032249	0.0240341	3.09471	0.00122271	0.00059244	0.13343
owl-2124-082	Biodonostia Health Research Institute	1362261	1362261	M	71	3	AD	2	867	0.0141317	0.0596797	0.0152627	0.0364676	1.74456	0.0061431	0.0367602	3.01973	0.900456	0.0936543	2.40488	0.00238305	0.00151119	0.137016
owl-2124-083	Biodonostia Health Research Institute	1596081	1596081	M	64	3	AD	2	194	0.00360322	0.0115121	0.00618851	0.0278017	1.28099	0.0013435	0.0260577	0.229856	0.050228	0.0428717	5.71008	0.00361711	0.00261501	1.46672
owl-2124-084	Biodonostia Health Research Institute	91943	91943	F	66	3	AD	2	8223	0.00597911	0.00801261	0.0115497	0.0258999	1.06935	0.00887299	0.154932	0.140008	0.571766	0.512889	3.44803	0.00193735	0.00229185	0.174744
owl-2124-085	Biodonostia Health Research Institute	1386138	1386138	M	63	3	AD	2	308	0.00607145	0.00860198	0.00152446	0.00546456	1.64645	0.00139335	0.0134661	0.161346	0.135889	0.0982262	3.37157	0.00365721	0.00175046	0.370523
owl-2124-086	Biodonostia Health Research Institute	1794076	1794076	F	69	3	AD	2	128	0.00168928	0.00221797	0.000582224	0.00122148	0.3155	0.000555923	0.000554975	0.111281	0.0431345	0.0101161	7.78353	0.000311335	0.00100964	0.114882
owl-2124-087	Biodonostia Health Research Institute	956378	956378	M	63	3	AD	2	128	0.00369907	0.00920317	0.00194187	0.00598231	1.248	0.00342357	0.00766369	0.444333	0.202609	0.0500169	1.38835	0.000456606	0.000768799	0.087208
owl-2124-088	Biodonostia Health Research Institute	131056	131056	F	54	3	AD	2	176	0.0011679	0.000678606	0.000249074	0.00117314	0.111916	0.000159956	0.00416456	0.0469296	0.000962734	0.0343586	0.61844	0.000530818	0.000155073	0.113484
owl-2124-089	Biodonostia Health Research Institute	737169	737169	M	65	3	AD	2	161	0.00263941	0.00462207	0.000684054	0.00378407	0.771966	0.000859415	0.00338072	0.130994	0.0821372	0.0105764	3.84219	0.00331019	0.00161318	0.0573031
owl-2124-090	Biodonostia Health Research Institute	1632217	1632217	F	53	3	AD	2	107	0.00144311	0.00363261	0.00146179	0.00800504	0.590231	0.000937332	0.000860299	0.0246874	0.0395738	0.0100721	1.80505	8.51868e-05	0.00107205	0.0926968
owl-2124-091	Biodonostia Health Research Institute	939523	939523	F	69	3	AD	2	148	0.00156743	0.00255331	0.000694474	0.00449667	0.660806	0.000864123	0.00175309	0.0632601	0.172008	0.00867442	1.87737	0.0131147	0.00345798	0.342467
owl-2124-092	Biodonostia Health Research Institute	2019369	2019369	F	65	3	AD	2	1445	0.00132273	0.00112577	0.000946037	0.00489126	0.308788	0.000479104	0.00489935	0.0227166	0.0262766	0.0297799	0.930451	0.00190965	0.00226052	0.0755772
owl-2124-093	Biodonostia Health Research Institute	1384376	1384376	M	63	3	AD	2	218	0.00384402	0.00149005	0.00042684	0.00103464	0.152795	0.00102101	0.000561725	0.0313023	0.0127809	0.00502263	0.228257	0.00169757	0.000610883	0.0502701
owl-2124-094	Biodonostia Health Research Institute	1797978	1797978	M	68	3	AD	2	1287	0.0115196	0.00917173	0.00356909	0.0103897	0.357262	0.00235999	0.0264103	0.188967	0.149049	0.0506114	5.26694	0.00706211	0.00237544	0.089263
owl-2124-095	Biodonostia Health Research Institute	1812253	1812253	M	63	3	AD	2	248	0.0262308	0.0622336	0.00675972	0.0405739	0.279226	0.00523307	0.00616861	0.685599	0.204532	0.0155531	2.47394	0.00662392	0.00194586	0.468563
owl-2124-096	Biodonostia Health Research Institute	10340501	10340501	F	69	3	AD	2	178	0.00236891	0.00210261	0.00078297	0.00333549	0.312861	0.00063562	0.00125606	0.079774	0.0335149	0.010465	0.63101	0.00051466	0.00108524	0.176501
owl-2124-097	Biodonostia Health Research Institute	291883	291883	F	71	3	CRC	3	170	0.00217833	0.00564647	0.0041197	0.000778098	1.01497	0.00583973	0.020166	0.0896565	0.0433216	0.0217989	39.5551	0.00492	0.00135194	0.179588
owl-2124-098	Biodonostia Health Research Institute	1791376	1791376	M	69	3	CRC	3	749	0.0130224	0.0196689	0.00650744	0.0139617	16.2904	0.00738914	0.00636248	2.18405	0.354413	0.048659	2.0826	0.000444805	0.00184127	2.35499
