# Supplementary material for: A Novel Approach on the Use of Samples from Faecal Occult Blood Screening Kits for Metabolomics Analysis: Application in Colorectal Cancer Population
Source: Metabolites. 2023 Feb 21;13(3):321. doi: 10.3390/metabo13030321 (PMC10055627; doi:10.3390/metabo13030321)
Supplement: Supplementary file 1 [file metabolites-13-00321-s001.zip › Table S4_Statistical Analysis.xlsx]

## Sheet: Batch 2
											ChoE (16:0)	ChoE (18:1)	ChoE (18:2)	ChoE (18:3)	ChoE (20:2)	ChoE (20:4)	ChoE (20:5)	ChoE (22:4)	ChoE (22:5)	ChoE (22:6)	PE(34:1)	SM(d18:1/23:0)	SM(42:3)	TG(54:1)
SampleFileName	Hospital/Institute	Hospital ID	SAMPLE.ID	SEXO		EDAD	Batch	Group	Level	FOB (µl/l)	ChoE_03	ChoE_07	ChoE_08	ChoE_09	ChoE_10	ChoE_12	ChoE_13	ChoE_14	ChoE_15	ChoE_17	DAPE02	SphLip_23	SphLip_28	TG48
owl-1923-001	Biodonostia Health Research Institute	L95F56	CTL13	-	-	-	2	CTL	1	-	0.00372833	0.00312032	0.00064136	0.0136073	0.586558	0.000420449	0.00341202	0.0657873	0.0493999	0.0188356	1.64016	0.032692	0.00590179	0.160207
owl-1923-002	Biodonostia Health Research Institute	L76XFH/67.009.253	CTL14	F	0	24	2	CTL	1	1759	0.00498729	0.000517666	0.000202793	0.00418239	0.397455	5.67011e-06	0.000628373	0.0802513	0.0981621	0.0219973	0.761809	0.0107529	0.00218116	0.102111
owl-1923-003	Biodonostia Health Research Institute	1609455	CTL15	F	0	58	2	CTL	1	132	0.00126747	0.00100415	9.71773e-05	0.00755561	0.17091	0.000295801	0.00517665	0.0243693	0.0208731	0.0253795	4.69837	3.39456e-05	0.00333026	0.0178528
owl-1923-004	Biodonostia Health Research Institute	60.393.628/74777/2018.10	CTL16	M	1	50	2	CTL	1	111	0.00273934	0.00149299	0.000546511	0.0139459	0.22629	6.41965e-05	0.010647	0.900971	0.00792807	0.0194249	0.537104	0.0330363	0.00922127	0.0649857
owl-1923-005	Biodonostia Health Research Institute	746226	CTL17	F	0	60	2	CTL	1	215	0.00446593	0.00175077	0.000211233	0.00280868	0.0890799	0.000276704	2.78295e-06	0.0276214	0.000518984	0.0130927	0.702622	0.00100065	0.000504166	0.0220487
owl-1923-006	Biodonostia Health Research Institute	1367529	CTL18	M	1	65	2	CTL	1	2260	0.0301575	0.0653578	0.0178068	0.0185487	1.82479	0.0116017	0.0146169	4.26456	1.40787	0.106729	3.79816	0.0020438	0.00205942	0.239298
owl-1923-007	Biodonostia Health Research Institute	1794197	CTL19	F	0	68	2	CTL	1	137	0.00442845	0.00649134	0.00314046	0.0184217	0.422604	0.00241159	0.01116	0.558178	0.412446	0.0364628	3.62811	0.00144215	0.00180003	0.270729
owl-1923-008	Biodonostia Health Research Institute	499564	CTL20	M	1	70	2	CTL	1	1237	0.0134248	0.00785642	0.00613552	0.0169241	2.44801	0.00325554	0.0516403	0.317005	0.0430027	0.0646617	1.829	0.00581734	0.0123854	0.239481
owl-1923-009	Biodonostia Health Research Institute	328410	CTL21	F	0	55	2	CTL	1	456	0.00997833	0.00286844	0.00314555	0.00607801	1.29117	1.57353e-05	0.0672236	1.67056	0.730895	0.0292407	5.24774	0.000205639	0.00241076	8.14283
owl-1923-010	Biodonostia Health Research Institute	2016696	CTL22	M	1	63	2	CTL	1	142	0.000716867	0.000474639	0.000112547	0.00250403	0.0698757	0.000117734	2.56616e-05	0.000435148	0.00048548	0.00066915	0.144616	0.000366907	6.0914e-05	0.166448
owl-1923-013	Biodonostia Health Research Institute	732612	CTL25	F	0	65	2	CTL	1	169	0.00373488	0.00427558	0.000610866	0.00531074	0.233292	0.000779229	0.0423867	0.144335	0.15894	0.0387452	0.837036	0.000840262	0.00312742	0.0482888
owl-1923-016	Biodonostia Health Research Institute	506393	AD21	M	1	64	2	AD	2	143	0.00402864	0.000519495	9.59688e-05	0.00374832	0.123529	6.73114e-05	5.5659e-05	0.0201247	0.000792807	0.00666331	0.600758	0.00402859	0.00111016	0.0341465
owl-1923-017	Biodonostia Health Research Institute	1613275	AD22	F	0	56	2	AD	2	1472	0.0184281	0.0253087	0.00747832	0.0172494	1.77903	0.00123669	0.0409639	1.60402	0.36917	0.0469561	3.17003	0.00346048	0.00209189	0.657168
owl-1923-018	Biodonostia Health Research Institute	91276	AD23	M	1	63	2	AD	2	399	0.00283476	0.00327449	0.000652396	0.00582908	0.563966	0.000589122	0.00415481	0.207512	0.0829084	0.0209443	10.3495	0.000429344	0.00222307	0.131093
owl-1923-019	Biodonostia Health Research Institute	1710056	AD24	M	1	62	2	AD	2	101	0.00788799	0.00614474	0.00190136	0.0197199	1.52826	0.00239344	0.0935709	0.431375	0.267305	0.277485	1.96424	0.000951537	0.00524338	0.0579409
owl-1923-020	Biodonostia Health Research Institute	11220077	AD25	M	1	55	2	AD	2	100	0.00696045	0.0104798	0.00229094	0.0115952	5.90963	0.000195692	0.00175996	0.57033	0.118313	0.0141692	4.84726	0.0117267	0.00693772	0.633457
owl-1923-021	Biodonostia Health Research Institute	524047	AD26	M	1	61	2	AD	2	190	0.0078851	0.00697936	0.00107239	0.00557741	0.328135	0.00135672	0.00166509	0.618942	0.231337	0.0267125	0.78137	0.0024433	0.00198213	0.081167
owl-1923-022	Biodonostia Health Research Institute	1387765	AD27	F	0	59	2	AD	2	182	0.00524904	0.00799538	0.000919976	0.0087988	0.713559	0.00134332	0.0598745	0.0762489	0.119854	0.277639	1.83848	0.00102654	0.00544804	0.0367495
owl-1923-023	Biodonostia Health Research Institute	336981	AD28	M	1	53	2	AD	2	156	0.00841241	0.00379573	0.000404112	0.00329702	0.145292	0.000434893	0.00155179	0.214684	0.0372091	0.0144326	3.82235	0.00152806	0.0010003	0.0583842
owl-1923-024	Biodonostia Health Research Institute	2356940	AD29	M	1	53	2	AD	2	263	0.000529225	0.00267785	0.00102259	0.00229699	1.00199	0.000120394	0.0478961	0.186747	0.0335143	0.0400816	3.44977	0.00196667	0.000417792	1.69851
owl-1923-025	Biodonostia Health Research Institute	2281737	AD30	M	1	64	2	AD	2	180	0.0180597	0.0158015	0.00270282	0.0119184	0.341646	0.00325659	0.00962368	2.39304	0.606309	0.054009	2.37738	0.000504515	0.00155843	0.679114
owl-1923-026	Biodonostia Health Research Institute	955419	AD31	M	1	60	2	AD	2	1374	0.00384145	0.00288665	0.000321324	0.00344007	0.065688	0.000545994	0.0065023	0.126065	0.09685	0.0315302	1.48427	0.00120347	0.00222732	0.0927254
owl-1923-031	Biodonostia Health Research Institute	2044462	CRC11	M	1	55	2	CRC	3	2330	0.00177775	0.00337521	0.00216839	0.0069304	0.90537	0.00128204	0.00730892	0.138915	0.0866838	0.0262687	1.17312	0.00131084	0.00235577	0.103593
owl-1923-032	Biodonostia Health Research Institute	955326	CRC12	F	0	60	2	CRC	3	1739	0.00566629	0.00356996	0.00197198	0.00707069	0.946199	0.00145103	0.00613431	0.0268266	0.105386	0.0177611	0.590309	0.000799797	0.001588	0.156446
owl-1923-033	Biodonostia Health Research Institute	772722	CRC13	M	1	50	2	CRC	3	254	0.00918082	0.0161781	0.00288265	0.0148071	0.348438	0.0140809	0.77939	3.13459	6.11143	0.761452	2.47009	0.0228612	0.00340591	0.232137
owl-1923-034	Biodonostia Health Research Institute	1147508	CRC14	F	0	65	2	CRC	3	1492	0.00283961	0.00154764	0.000522685	0.00315202	0.00145026	0.00127757	0.00310724	0.000680151	0.0132092	0.0307698	0.223909	0.00151313	0.00101414	0.0166346
owl-1923-036	Biodonostia Health Research Institute	1366383	CRC17	F	0	66	2	CRC	3	1226	0.00931713	0.0107082	0.00474331	0.00826002	1.05579	0.00560649	0.0359627	0.0990461	0.0404283	0.0583381	4.50211	0.00598587	0.0107123	0.0527275
owl-1923-037	Biodonostia Health Research Institute	294533	CRC18	M	1	67	2	CRC	3	1287	0.00228924	0.00219604	0.00145447	0.00814551	0.194677	0.000349814	0.00210357	0.184281	0.13183	0.0125851	3.07463	0.00532811	0.00336851	0.077283
owl-1923-038	Biodonostia Health Research Institute	77259	CRC19	M	1	67	2	CRC	3	2912	0.0113433	0.0141894	0.00374863	0.0129322	0.214263	0.00887716	0.0257213	0.933664	0.34326	0.0389216	2.26152	0.00856784	0.00843982	0.196887
owl-1923-039	Biodonostia Health Research Institute	502203	CRC20	M	1	69	2	CRC	3	2120	0.00761244	0.00670405	0.00815869	0.00796232	0.768985	0.00681033	0.0380767	0.138901	0.107927	0.0692866	2.76448	0.000288977	0.00110153	0.12241
owl-1923-040	Biodonostia Health Research Institute	547162	CRC21	M	1	54	2	CRC	3	3819	0.0104202	0.00796827	0.00293792	0.00508142	1.16691	0.000660686	0.00361144	0.145599	0.0199888	0.0315144	1.05079	0.000743646	0.000459254	0.0612635
owl-1923-041	Biodonostia Health Research Institute	1404652	CRC22	F	0	54	2	CRC	3	4943	0.010489	0.00948422	0.01051	0.019369	0.87181	0.00711896	0.055521	0.214048	0.182663	0.0627423	1.78468	0.00682753	0.00986788	0.156006
owl-1923-042	Biodonostia Health Research Institute	90555	CRC23	F	0	62	2	CRC	3	471	0.00769533	0.0073329	0.00320443	0.00607544	0.369238	0.00244348	0.0299907	0.0672698	0.0504976	0.0295406	1.03071	0.00320106	0.00328341	0.067059
									pnom 12	0.00656626	0.00135599	0.001	0.00501033	0.288773	0.0124394	0.001	0.00754356	0.0142525	0.00218325	0.0439737	0.142074	0.00295735	0.0118922	0.001
									pnorm 13	0.001	0.0296937	0.155948	0.0403721	0.147205	0.0334933	0.140312	0.00324121	0.00658615	0.0315892	0.001	0.137678	0.0453476	0.00210862	0.00250463
									pnorm 23	0.5	0.326547	0.5	0.0741675	0.00847205	0.326908	0.103707	0.001	0.001	0.001	0.001	0.465614	0.125269	0.00517332	0.5
									pANOVA BH	0.00101248	0.980303	0.980303	0.807312	0.965876	0.807312	0.588093	0.807312	0.965876	0.807312	0.807312	0.807312	0.807312	0.807312	0.807312
									pttest 12	1	1	1	1	1	1	1	1	1	1	1	0.788296	0.440294	1	1
									pttest 13	0.00889693	1	1	1	1	1	0.161325	0.676738	1	1	0.765827	1	1	1	0.684974
									pttest 23	0.00151354	1	1	0.561651	1	0.844403	0.0529623	0.788689	1	0.933024	1	0.475714	1	0.990742	1
									pKW BH	0.00195645	0.870382	0.514424	0.387284	0.870382	0.940584	0.240715	0.870382	0.870382	0.870382	0.870382	0.870382	0.870382	0.870382	0.870382
									pMW 12	1	1	0.398981	1	1	1	1	1	1	1	1	0.994948	1	1	1
									pMW 13	0.0185759	1	0.141922	0.304248	1	1	0.0473072	1	1	1	0.81095	1	1	1	1
									pMW 23	0.00118225	1	1	0.0385126	1	1	0.0473072	1	0.650835	1	1	0.650835	1	1	1
									log2(FC) 12	-0.674865	0.0790977	-0.149065	-0.791622	-0.23344	0.687876	-0.737775	0.371105	-0.320623	-0.577686	1.11122	0.541868	-1.59191	-0.507281	-1.18727
									log2(FC) 13	1.63391	-0.0181967	-0.193596	0.373647	-0.139112	-0.181406	1.37629	2.25387	-0.663805	1.2955	1.60211	-0.187138	-0.619545	0.0851719	-2.93083
									log2(FC) 23	2.30877	-0.0972945	-0.0445306	1.16527	0.0943281	-0.869282	2.11407	1.88277	-0.343182	1.87318	0.490894	-0.729007	0.97237	0.592453	-1.74356

## Sheet: Batch 3
											ChoE (16:0)	ChoE (18:1)	ChoE (18:2)	ChoE (18:3)	ChoE (20:2)	ChoE (20:4)	ChoE (20:5)	ChoE (22:4)	ChoE (22:5)	ChoE (22:6)	PE(34:1)	SM(d18:1/23:0)	SM(42:3)	TG(54:1)
SampleFileName	Hospital/Institute	Hospital ID	SAMPLE.ID	SEXO	SEXO	EDAD	Batch	Group	Level	FOB (µl/l)	ChoE_03	ChoE_07	ChoE_08	ChoE_09	ChoE_10	ChoE_12	ChoE_13	ChoE_14	ChoE_15	ChoE_17	DAPE02	SphLip_23	SphLip_28	TG48
owl-2124-001	Biodonostia Health Research Institute	985524	985524	M	1	53	3	CTL	1	294	0.00323707	0.00278182	0.00123586	0.00380406	0.710043	0.000805097	0.00440262	0.0670612	0.0671277	0.017704	0.437674	0.000541555	0.000326448	0.0751968
owl-2124-002	Biodonostia Health Research Institute	2541654	2541654	M	1	60	3	CTL	1	470	0.00861261	0.0129505	0.00324885	0.00727329	0.378917	0.00585237	0.00614405	0.580754	0.157536	0.0175937	5.65178	0.000716214	0.00177648	0.146143
owl-2124-003	Biodonostia Health Research Institute	936074	936074	M	1	69	3	CTL	1	906	0.00748343	0.00916044	0.00206149	0.00385493	0.204517	0.00360142	0.00561725	0.648837	0.214716	0.0217214	3.41115	0.00263152	0.00131401	0.0513604
owl-2124-004	Biodonostia Health Research Institute	1197371	1197371	M	1	53	3	CTL	1	525	0.0124427	0.00925677	0.00214479	0.00496215	0.211279	0.00280893	0.0124797	0.98802	0.252975	0.117121	1.66444	0.00285288	0.000691965	0.244815
owl-2124-005	Biodonostia Health Research Institute	2062885	2062885	M	1	51	3	CTL	1	274	0.0140508	0.0416275	0.0120934	0.0269755	2.51955	0.00568844	0.0101578	0.694179	0.3234	0.0472793	5.52488	0.00217141	0.00159702	0.382035
owl-2124-006	Biodonostia Health Research Institute	1210324	1210324	F	0	51	3	CTL	1	336	0.00980653	0.0106212	0.00145075	0.00686131	0.531297	0.00195395	0.00311716	0.509402	0.164627	0.0252787	0.498523	0.000431936	0.000200886	0.128676
owl-2124-007	Biodonostia Health Research Institute	529208	529208	F	0	61	3	CTL	1	106	0.00085546	0.00214881	0.00273464	0.0101276	0.549037	0.00108807	0.0189518	0.0912743	0.33803	0.0908325	0.820155	0.00236925	0.000953511	1.34473
owl-2124-008	Biodonostia Health Research Institute	961163	961163	F	0	61	3	CTL	1	142	0.00287499	0.00498018	0.00327489	0.0105749	1.06455	0.00111486	0.00667131	0.157774	0.047037	0.0362858	1.40448	0.000703068	0.000367838	2.54003
owl-2124-009	Biodonostia Health Research Institute	296225	296225	M	1	69	3	CTL	1	340	0.00337633	0.000407126	0.000143301	0.000859371	0.197627	0.000218635	0.000452727	0.000735011	0.00518984	0.00467504	0.112534	0.000811704	0.0002451	0.00954189
owl-2124-010	Biodonostia Health Research Institute	761114	761114	M	1	58	3	CTL	1	185	0.00185498	0.00256968	0.000721572	0.00230395	0.303081	0.000366782	0.000256616	0.0164308	0.000650196	0.00940889	0.384071	0.00069287	0.000298102	0.0836565
owl-2124-011	Biodonostia Health Research Institute	953867	953867	M	1	62	3	CTL	1	101	0.00929605	0.0156548	0.00416015	0.0364091	0.901533	0.0018224	0.0157362	0.84541	0.401601	0.0711475	1.68869	0.00232076	0.000623665	0.117936
owl-2124-012	Biodonostia Health Research Institute	2004875	2004875	F	0	69	3	CTL	1	526	0.00174076	0.000754748	0.000785783	0.00167079	0.0703922	0.00110059	0.00164745	0.0114523	0.000675196	0.0127715	0.481939	0.00130621	0.000910977	0.0410687
owl-2124-013	Biodonostia Health Research Institute	777110	777110	F	0	53	3	CTL	1	296	0.0125796	0.0102722	0.00361345	0.00494381	0.215608	0.00377317	0.0155486	0.169497	0.352752	0.0747214	1.08303	0.00508733	0.00400255	0.0500369
owl-2124-014	Biodonostia Health Research Institute	2038131	2038131	M	1	59	3	CTL	1	386	0.0168222	0.023382	0.00657695	0.0273741	1.00759	0.0035702	0.00482217	0.564623	0.745201	0.0330829	1.4802	0.00357936	0.00113508	0.0321671
owl-2124-015	Biodonostia Health Research Institute	1846118	1846118	F	0	53	3	CTL	1	9026	0.0144562	0.0169291	0.00305672	0.00468347	0.880314	0.00429884	0.0110596	0.284628	0.144855	0.0404045	1.94699	0.000636713	0.00170666	0.101845
owl-2124-016	Biodonostia Health Research Institute	1924444	1924444	M	1	57	3	CTL	1	131	0.000680276	0.00171633	0.000535181	0.00242746	0.232665	0.000883321	0.00103341	0.100908	0.0564454	0.0248614	1.40033	0.00171694	0.00133686	0.0907637
owl-2124-017	Biodonostia Health Research Institute	987992	987992	F	0	54	3	CTL	1	333	0.00186139	0.000651959	0.00082889	0.000809233	0.80373	0.00240314	0.0226505	0.626267	0.38132	0.143789	4.23586	0.0221962	0.000961972	0.273554
owl-2124-018	Biodonostia Health Research Institute	1195060	1195060	M	1	54	3	CTL	1	574	0.00949862	0.0109451	0.00173713	0.00357965	0.283878	0.00494565	0.113126	4.44067	0.997499	0.607587	2.0412	0.00102485	0.00115784	0.338967
owl-2124-019	Biodonostia Health Research Institute	536115	536115	M	1	59	3	CTL	1	723	0.00538772	0.00774606	0.00152862	0.00982812	0.50844	0.000655967	0.0033537	0.174533	0.10337	0.0232564	8.03221	0.00204645	0.00155675	0.0517289
owl-2124-020	Biodonostia Health Research Institute	558504	558504	F	0	53	3	CTL	1	356	0.00680883	0.0229244	0.00231585	0.00969859	0.282784	0.00482179	0.00998781	0.319686	0.532807	0.0208025	13.5966	0.0274478	0.00591501	0.111931
owl-2124-021	Biodonostia Health Research Institute	1386673	1386673	F	0	61	3	CTL	1	1356	0.00905939	0.011836	0.00218173	0.0062936	11.7967	0.00247048	0.00530542	0.233937	0.0514348	0.0561746	2.05453	0.0015663	0.000742612	0.04844
owl-2124-022	Biodonostia Health Research Institute	97455	97455	F	0	64	3	CTL	1	203	0.00171951	0.00311818	0.00376672	0.00532066	0.371094	0.000966845	0.0423942	0.019439	0.0748095	0.0410204	1.01756	0.00181612	0.00125928	0.842936
owl-2124-023	Biodonostia Health Research Institute	92079	92079	F	0	66	3	CTL	1	104	0.0028583	0.00644454	0.00188451	0.00346368	1.05585	0.000919494	0.0100988	0.922143	0.490213	0.0095941	4.30063	0.00027227	0.000673135	0.299961
owl-2124-024	Biodonostia Health Research Institute	966024	966024	F	0	59	3	CTL	1	405	0.00528957	0.00546949	0.000841867	0.00285074	0.121369	0.000879457	0.00192357	0.190944	0.169196	0.0201105	0.576752	0.000391545	0.000334544	0.0363537
owl-2124-025	Biodonostia Health Research Institute	1810325	1810325	M	1	62	3	CTL	1	131	0.0133812	0.00845631	0.00184481	0.0058589	0.736377	0.00227621	0.00897428	0.703581	0.188431	0.0297115	2.95302	0.00278693	0.000716018	0.0682494
owl-2124-026	Biodonostia Health Research Institute	991615	991615	M	1	58	3	CTL	1	718	0.00145437	0.00113462	0.000342288	0.00158732	0.128785	0.000766228	0.0155018	0.0359216	0.0206309	0.0476737	0.643718	0.000258557	0.00087497	0.275391
owl-2124-027	Biodonostia Health Research Institute	10831001	10831001	M	1	68	3	CTL	1	181	0.00450648	0.0061313	0.00138781	0.00728459	6.63461	0.00231777	0.00285654	0.461812	0.164146	0.0143842	3.7533	0.000610664	0.00174639	0.116958
owl-2124-028	Biodonostia Health Research Institute	1594901	1594901	F	0	63	3	CTL	1	135	0.00540308	0.00599626	0.00139728	0.00277004	0.0684614	0.00151937	0.0253998	1.34161	0.950751	0.229032	2.17536	0.000787768	0.000538068	0.0453491
owl-2124-029	Biodonostia Health Research Institute	743863	743863	F	0	63	3	CTL	1	115	0.00809119	0.0107681	0.00246927	0.00361244	0.566514	0.00279673	0.00803576	0.314425	0.103005	0.0234209	2.60954	0.000547739	0.000585318	0.102941
owl-2124-030	Biodonostia Health Research Institute	2338596	2338596	F	0	67	3	CTL	1	123	0.00404389	0.00172862	0.000486246	0.00422189	0.361457	0.00014502	0.00176023	0.000680151	0.0212959	0.00787609	1.34574	0.00117424	0.00059243	0.104561
owl-2124-031	Biodonostia Health Research Institute	2013402	2013402	M	1	67	3	CTL	1	163	0.00533687	0.0077333	0.00438984	0.0106189	1.54438	0.00391642	0.123651	1.399	1.61026	0.14108	4.5667	0.00379676	0.00224503	2.59774
owl-2124-032	Biodonostia Health Research Institute	1799022	1799022	F	0	66	3	CTL	1	265	0.00447517	0.00711425	0.00187444	0.0081386	0.560906	0.00149571	0.00753185	0.151061	0.0619112	0.0385666	4.63639	0.00214557	0.00170373	0.0868591
owl-2124-033	Biodonostia Health Research Institute	2005708	2005708	M	1	70	3	CTL	1	160	0.0107276	0.017009	0.0112198	0.0130922	1.26694	0.00166916	0.00317359	0.266944	0.0829191	0.0306752	2.09885	0.00200515	0.00186989	0.495949
owl-2124-034	Biodonostia Health Research Institute	1390400	1390400	F	0	61	3	CTL	1	133	0.00129164	0.00202113	0.000612584	0.00175367	0.458954	0.000375067	0.00218009	0.0434871	0.0390466	0.00826488	1.36116	0.00028596	0.000149291	0.104435
owl-2124-035	Biodonostia Health Research Institute	10186169	10186169	F	0	54	3	CTL	1	128	0.0147781	0.0221524	0.0085476	0.00864384	4.46385	0.00251111	0.00251624	0.255285	0.182771	0.0270897	1.22492	0.00394018	0.00120521	0.146999
owl-2124-036	Biodonostia Health Research Institute	732528	732528	M	1	66	3	CTL	1	217	0.00226807	0.00392693	0.00166929	0.00787906	2.09923	0.000260263	0.00422118	0.0736906	0.0255531	0.0277439	3.09462	0.0101152	0.00276777	3.87841
owl-2124-037	Biodonostia Health Research Institute	1823761	1823761	M	1	60	3	CTL	1	143	0.0224542	0.0459756	0.026753	0.0137282	1.6162	0.0102375	0.233224	3.65928	2.93457	0.102523	42.3722	0.00162632	0.000429868	1.85106
owl-2124-038	Biodonostia Health Research Institute	1161733	1161733	F	0	65	3	CTL	1	3368	0.00444637	0.00243967	0.000744263	0.00174262	0.0232645	0.00136528	0.0039592	0.0103487	0.0130832	0.0118533	0.400663	0.000196374	9.18905e-05	0.017479
owl-2124-039	Biodonostia Health Research Institute	951519	951519	F	0	65	3	CTL	1	400	0.00381887	0.00383181	0.000694082	0.00156603	0.190263	0.000695505	0.00346722	0.108797	0.027813	0.027558	0.236611	0.000105424	0.00108333	0.0296917
owl-2124-040	Biodonostia Health Research Institute	307866	307866	F	0	65	3	CTL	1	256	0.00228697	0.00123868	0.000498333	0.00245848	0.425109	0.000301665	0.000826488	0.037771	0.0125057	0.0030613	0.141013	0.000738649	0.000405141	0.339852
owl-2124-041	Biodonostia Health Research Institute	298343	298343	M	1	68	3	CTL	1	199	0.00919977	0.00764706	0.0020342	0.00802002	0.526676	0.00191165	0.00541355	0.300191	0.0795204	0.044403	4.1863	0.0010365	0.000692464	0.0704659
owl-2124-042	Biodonostia Health Research Institute	1282048	1282048	F	0	67	3	CTL	1	234	0.00480049	0.00464913	0.000757326	0.00239329	0.232526	0.00133891	0.028572	0.595929	0.273942	0.152618	7.4427	0.00403466	0.00192919	0.0568405
owl-2124-043	Biodonostia Health Research Institute	977191	977191	F	0	57	3	CTL	1	202	0.00400271	0.00211334	0.000512134	0.0016066	0.0296729	0.000861943	0.00121089	0.0498849	0.0232835	0.0119251	1.13574	0.00190852	0.000558691	0.11742
owl-2124-044	Biodonostia Health Research Institute	1807652	1807652	F	0	65	3	CTL	1	385	0.00970228	0.00638692	0.00381678	0.00443544	0.61282	0.0031398	0.00243446	0.202007	0.0612735	0.00846893	12.3272	0.00100074	0.0010067	0.263501
owl-2124-045	Biodonostia Health Research Institute	1630987	1630987	M	1	54	3	CTL	1	320	0.00416932	0.00240303	0.00130827	0.00399138	0.196391	0.00239866	0.00789909	0.116735	0.0767498	0.0210329	1.2059	0.00202471	0.000346367	0.208031
owl-2124-046	Biodonostia Health Research Institute	2006704	2006704	F	0	70	3	CTL	1	127	0.0128411	0.0161955	0.00341397	0.0115949	0.362016	0.00490906	0.0946409	1.27861	1.40748	0.283633	3.83585	0.000128154	0.00048447	0.178948
owl-2124-047	Biodonostia Health Research Institute	1812171	1812171	F	0	63	3	CTL	1	416	0.00192978	0.00379281	0.00164059	0.00705733	0.463285	0.00123806	0.0179501	0.130707	0.11671	0.0288476	1.06657	0.00192857	0.0014697	0.304473
owl-2124-048	Biodonostia Health Research Institute	2036694	2036694	M	1	60	3	CTL	1	293	0.00425908	0.00499549	0.00159536	0.00431374	0.227404	0.00196553	0.0091973	0.0737991	0.0842253	0.0406142	1.02119	0.00520084	0.000968399	0.379899
owl-2124-049	Biodonostia Health Research Institute	79846	79846	F	0	70	3	CTL	1	6360	0.00480033	0.00473946	0.00206519	0.00270516	0.117111	0.00487926	0.0132417	0.175926	0.122596	0.0316006	0.610361	0.00470772	0.00363612	0.182031
owl-2124-050	Biodonostia Health Research Institute	11948655	11948655	M	1	52	3	CTL	1	138	0.00104311	0.001082	0.000249216	0.00397583	0.0729149	0.000230492	2.78295e-05	0.0146279	0.0048548	0.00480024	0.50112	0.00129774	0.000573411	0.0290729
owl-2124-051	Biodonostia Health Research Institute	1389134	1389134	F	0	62	3	CTL	1	581	0.00631834	0.00375017	0.000823785	0.000936043	1.2614	0.000323666	0.000299974	0.00435148	0.00650196	0.00693277	3.0711	0.000296909	0.000233399	0.126872
owl-2124-052	Biodonostia Health Research Institute	1163098	1163098	F	0	64	3	AD	2	178	0.0345671	0.136995	0.0220492	0.0315863	1.92192	0.0317999	0.273258	8.14135	3.48409	0.519712	0.880993	0.000491736	4.87395e-13	0.115682
owl-2124-053	Biodonostia Health Research Institute	2263651	2263651	M	1	50	3	AD	2	220	0.00667241	0.00845089	0.00172929	0.00643219	0.891419	0.0014365	0.00796223	0.212171	0.137086	0.056762	5.39937	0.000971198	0.000666849	0.0885913
owl-2124-054	Biodonostia Health Research Institute	1592587	1592587	F	0	64	3	AD	2	435	0.00154996	0.00540287	0.00279034	0.0416714	23.3066	0.00498759	0.0423727	0.34394	0.536669	0.298741	1.04347	0.000392517	0.0036497	1.63149
owl-2124-055	Biodonostia Health Research Institute	776406	776406	M	1	53	3	AD	2	307	0.00791836	0.00825863	0.0032509	0.0187409	0.85014	0.00235518	0.00712807	0.462529	0.0961387	0.050445	0.611988	0.00318711	0.00102142	0.117543
owl-2124-056	Biodonostia Health Research Institute	1360956	1360956	F	0	71	3	AD	2	258	0.0188316	0.0351226	0.00662806	0.0255038	1.94832	0.00236632	0.0148648	0.908897	0.307501	0.056542	1.30798	0.00264471	0.00216911	0.0802025
owl-2124-057	Biodonostia Health Research Institute	1497237	1497237	F	0	50	3	AD	2	106	0.000781879	0.00122381	0.000479969	0.000688366	0.128808	0.000293634	2.99974e-05	0.000870295	0.00675196	0.00301029	1.42695	0.000954579	0.000414423	0.203428
owl-2124-058	Biodonostia Health Research Institute	1367640	1367640	F	0	69	3	AD	2	293	0.00294455	0.00504399	0.00487072	0.00880532	1.90934	0.00242087	0.045458	1.33667	0.596316	0.0235222	5.1623	0.000386285	0.000189333	6.59055
owl-2124-059	Biodonostia Health Research Institute	940202	940202	F	0	67	3	AD	2	228	0.0396072	0.0805585	0.0228049	0.0381785	2.95444	0.0114828	0.105586	14.9793	2.4854	0.174975	0.882916	0.0167145	0.00129978	0.383452
owl-2124-060	Biodonostia Health Research Institute	1610352	1610352	F	0	58	3	AD	2	207	0.00618064	0.00247086	0.000555026	0.00138324	0.0360931	0.000723449	0.00147952	0.0011153	0.00962734	0.00792708	0.340924	0.00299172	0.000314801	0.0121481
owl-2124-061	Biodonostia Health Research Institute	82884	82884	F	0	69	3	AD	2	396	0.00798605	0.00783811	0.00123388	0.00364341	0.211761	0.00206125	0.00389949	0.397954	0.158706	0.029673	1.4312	0.000362149	0.000238779	0.0607593
owl-2124-062	Biodonostia Health Research Institute	972161	972161	M	1	58	3	AD	2	189	0.007385	0.0143824	0.00246365	0.00927295	1.36828	0.0015863	0.00804962	0.250734	0.273224	0.0198908	11.1959	0.00037927	0.0018386	0.519225
owl-2124-063	Biodonostia Health Research Institute	727296	727296	M	1	67	3	AD	2	515	0.00465466	0.00602885	0.000908296	0.0018684	0.0858923	0.00164775	0.0113903	0.725188	0.300324	0.0763556	6.41054	0.0034069	0.00187944	0.152453
owl-2124-064	Biodonostia Health Research Institute	310459	310459	M	1	64	3	AD	2	319	0.00477685	0.00442939	0.00132591	0.00146836	0.187547	0.00202406	0.000497752	0.234591	0.0738654	0.00931171	6.29861	0.000478735	0.000477046	0.292134
owl-2124-065	Biodonostia Health Research Institute	302623	302623	M	1	67	3	AD	2	949	0.00540621	0.0074512	0.00191073	0.00467261	0.240607	0.00313608	0.058436	0.34166	0.413798	0.131351	0.876089	0.000330714	0.000767707	0.0843619
owl-2124-066	Biodonostia Health Research Institute	2037554	2037554	M	1	58	3	AD	2	266	0.00262371	0.0030906	0.000768844	0.00179132	0.131203	0.000627281	0.00416111	0.0709882	0.0705562	0.0120733	1.79987	0.00162941	9.15456e-05	0.0528287
owl-2124-067	Biodonostia Health Research Institute	2021830	2021830	M	1	63	3	AD	2	227	0.0121636	0.0122726	0.00230357	0.00601959	0.184972	0.00374991	0.0109016	1.19997	0.3913	0.0534833	1.08601	0.00118174	0.001096	0.0395773
owl-2124-068	Biodonostia Health Research Institute	2032652	2032652	M	1	59	3	AD	2	290	0.0144528	0.035347	0.0151746	0.0195272	1.94862	0.00802151	0.0833121	1.25656	0.705693	0.127528	6.27863	0.0021825	0.00296724	0.667818
owl-2124-069	Biodonostia Health Research Institute	962486	962486	M	1	61	3	AD	2	290	0.00512067	0.0121735	0.00337566	0.0119153	1.05672	0.00281124	0.00815301	0.226179	0.0906645	0.0240891	1.92461	0.00153363	0.000889055	0.255705
owl-2124-070	Biodonostia Health Research Institute	972267	972267	M	1	57	3	AD	2	290	0.00864469	0.0171359	0.00967272	0.011265	0.863433	0.00960419	0.0210169	1.56184	0.634824	0.0347007	2.95319	0.000503653	0.000806353	0.0581108
owl-2124-071	Biodonostia Health Research Institute	1376052	1376052	M	1	65	3	AD	2	195	0.00251607	0.00600608	0.00407431	0.0103255	1.13249	0.00123109	0.0701823	0.181566	0.172161	0.226004	9.85599	0.00429126	0.00178272	1.30876
owl-2124-072	Biodonostia Health Research Institute	508869	508869	M	1	70	3	AD	2	982	0.00740049	0.0042928	0.0015439	0.00250863	0.0145026	0.00223743	0.00490312	0.0420016	0.129754	0.0169266	1.32855	0.00213641	0.00285707	0.0421236
owl-2124-073	Biodonostia Health Research Institute	745235	745235	F	0	61	3	AD	2	110	0.00625844	0.00880113	0.00200882	0.0098766	37.2306	0.00171035	0.00303329	0.268236	0.113921	0.030996	1.71434	0.000669355	0.000491647	0.089027
owl-2124-074	Biodonostia Health Research Institute	2137670	2137670	F	0	67	3	AD	2	589	0.0065446	0.00341784	0.000802199	0.00139572	0.30277	0.000397275	0.00395613	0.219282	0.203987	0.0237635	0.975544	0.000389448	0.00101037	0.0952776
owl-2124-075	Biodonostia Health Research Institute	536016	536016	M	1	61	3	AD	2	499	0.0146887	0.0283962	0.00460663	0.00928749	0.686216	0.00605945	0.00937714	0.576793	0.208036	0.0481315	21.7299	0.0096703	0.00370466	0.112136
owl-2124-076	Biodonostia Health Research Institute	348275	348275	F	0	52	3	AD	2	809	0.027298	0.0561037	0.0166427	0.0350224	1.31903	0.00789269	0.02313	0.810141	0.149588	0.0622367	6.1838	0.016718	0.00748331	0.0515892
owl-2124-077	Biodonostia Health Research Institute	991383	991383	M	1	53	3	AD	2	193	0.00297038	0.00304945	0.0007361	0.00448479	0.351546	0.000935558	0.00930811	0.156204	0.64206	0.073802	1.18007	0.000975766	0.000349493	0.0694954
owl-2124-078	Biodonostia Health Research Institute	1598550	1598550	M	1	63	3	AD	2	109	0.000734269	0.00126016	0.000472914	0.00153805	0.302269	0.000333985	0.00348048	0.02977	0.0213486	0.0195692	1.55438	0.0011429	0.00124769	0.0649036
owl-2124-079	Biodonostia Health Research Institute	562444	562444	F	0	51	3	AD	2	173	0.00424912	0.0160076	0.00256415	0.00292326	0.388664	0.00102389	0.00545168	0.463187	0.138199	0.0257979	3.17309	0.000288504	0.00125366	0.0266364
owl-2124-080	Biodonostia Health Research Institute	1603525	1603525	F	0	61	3	AD	2	181	0.00448027	0.00780658	0.00207838	0.00643145	1.89196	0.00086616	0.00163141	0.360056	0.11493	0.0207307	6.35266	0.00254897	0.000730843	0.10932
owl-2124-081	Biodonostia Health Research Institute	2020954	2020954	F	0	65	3	AD	2	194	0.0023403	0.00258352	0.00117018	0.00341041	0.378415	0.000936717	0.00838626	0.0268174	0.032249	0.0240341	3.09471	0.00122271	0.00059244	0.13343
owl-2124-082	Biodonostia Health Research Institute	1362261	1362261	M	1	71	3	AD	2	867	0.0141317	0.0596797	0.0152627	0.0364676	1.74456	0.0061431	0.0367602	3.01973	0.900456	0.0936543	2.40488	0.00238305	0.00151119	0.137016
owl-2124-083	Biodonostia Health Research Institute	1596081	1596081	M	1	64	3	AD	2	194	0.00360322	0.0115121	0.00618851	0.0278017	1.28099	0.0013435	0.0260577	0.229856	0.050228	0.0428717	5.71008	0.00361711	0.00261501	1.46672
owl-2124-084	Biodonostia Health Research Institute	91943	91943	F	0	66	3	AD	2	8223	0.00597911	0.00801261	0.0115497	0.0258999	1.06935	0.00887299	0.154932	0.140008	0.571766	0.512889	3.44803	0.00193735	0.00229185	0.174744
owl-2124-085	Biodonostia Health Research Institute	1386138	1386138	M	1	63	3	AD	2	308	0.00607145	0.00860198	0.00152446	0.00546456	1.64645	0.00139335	0.0134661	0.161346	0.135889	0.0982262	3.37157	0.00365721	0.00175046	0.370523
owl-2124-086	Biodonostia Health Research Institute	1794076	1794076	F	0	69	3	AD	2	128	0.00168928	0.00221797	0.000582224	0.00122148	0.3155	0.000555923	0.000554975	0.111281	0.0431345	0.0101161	7.78353	0.000311335	0.00100964	0.114882
owl-2124-087	Biodonostia Health Research Institute	956378	956378	M	1	63	3	AD	2	128	0.00369907	0.00920317	0.00194187	0.00598231	1.248	0.00342357	0.00766369	0.444333	0.202609	0.0500169	1.38835	0.000456606	0.000768799	0.087208
owl-2124-088	Biodonostia Health Research Institute	131056	131056	F	0	54	3	AD	2	176	0.0011679	0.000678606	0.000249074	0.00117314	0.111916	0.000159956	0.00416456	0.0469296	0.000962734	0.0343586	0.61844	0.000530818	0.000155073	0.113484
owl-2124-089	Biodonostia Health Research Institute	737169	737169	M	1	65	3	AD	2	161	0.00263941	0.00462207	0.000684054	0.00378407	0.771966	0.000859415	0.00338072	0.130994	0.0821372	0.0105764	3.84219	0.00331019	0.00161318	0.0573031
owl-2124-090	Biodonostia Health Research Institute	1632217	1632217	F	0	53	3	AD	2	107	0.00144311	0.00363261	0.00146179	0.00800504	0.590231	0.000937332	0.000860299	0.0246874	0.0395738	0.0100721	1.80505	8.51868e-05	0.00107205	0.0926968
owl-2124-091	Biodonostia Health Research Institute	939523	939523	F	0	69	3	AD	2	148	0.00156743	0.00255331	0.000694474	0.00449667	0.660806	0.000864123	0.00175309	0.0632601	0.172008	0.00867442	1.87737	0.0131147	0.00345798	0.342467
owl-2124-092	Biodonostia Health Research Institute	2019369	2019369	F	0	65	3	AD	2	1445	0.00132273	0.00112577	0.000946037	0.00489126	0.308788	0.000479104	0.00489935	0.0227166	0.0262766	0.0297799	0.930451	0.00190965	0.00226052	0.0755772
owl-2124-093	Biodonostia Health Research Institute	1384376	1384376	M	1	63	3	AD	2	218	0.00384402	0.00149005	0.00042684	0.00103464	0.152795	0.00102101	0.000561725	0.0313023	0.0127809	0.00502263	0.228257	0.00169757	0.000610883	0.0502701
owl-2124-094	Biodonostia Health Research Institute	1797978	1797978	M	1	68	3	AD	2	1287	0.0115196	0.00917173	0.00356909	0.0103897	0.357262	0.00235999	0.0264103	0.188967	0.149049	0.0506114	5.26694	0.00706211	0.00237544	0.089263
owl-2124-095	Biodonostia Health Research Institute	1812253	1812253	M	1	63	3	AD	2	248	0.0262308	0.0622336	0.00675972	0.0405739	0.279226	0.00523307	0.00616861	0.685599	0.204532	0.0155531	2.47394	0.00662392	0.00194586	0.468563
owl-2124-096	Biodonostia Health Research Institute	10340501	10340501	F	0	69	3	AD	2	178	0.00236891	0.00210261	0.00078297	0.00333549	0.312861	0.00063562	0.00125606	0.079774	0.0335149	0.010465	0.63101	0.00051466	0.00108524	0.176501
owl-2124-097	Biodonostia Health Research Institute	291883	291883	F	0	71	3	CRC	3	170	0.00217833	0.00564647	0.0041197	0.000778098	1.01497	0.00583973	0.020166	0.0896565	0.0433216	0.0217989	39.5551	0.00492	0.00135194	0.179588
owl-2124-098	Biodonostia Health Research Institute	1791376	1791376	M	1	69	3	CRC	3	749	0.0130224	0.0196689	0.00650744	0.0139617	16.2904	0.00738914	0.00636248	2.18405	0.354413	0.048659	2.0826	0.000444805	0.00184127	2.35499
									pnom 12	0.001	0.001	0.001	0.001	0.001	0.001	0.00902285	0.001	0.001	0.001	0.001	0.001	0.001	0.00258689	0.001
									pnorm 13	0.001	0.001	0.001	0.001	0.001	0.001	0.001	0.001	0.001	0.001	0.001	0.001	0.001	0.00829467	0.001
									pnorm 23	NaN	NaN	NaN	NaN	NaN	NaN	NaN	NaN	NaN	NaN	NaN	NaN	NaN	NaN	NaN
									pANOVA BH	0.880702	0.852898	0.428916	0.679236	0.328198	0.328198	0.428916	0.862276	0.734535	0.938672	0.862276	0.00538072	0.993575	0.679236	0.679236
									pttest 12	1	0.966328	0.160202	0.472895	0.0663743	0.728776	0.425897	1	0.724488	1	1	1	1	0.548956	1
									pttest 13	1	1	1	1	1	0.075669	0.327544	1	1	1	1	0.000255906	1	1	0.520264
									pttest 23	1	1	1	1	1	0.167651	0.70646	1	1	1	1	0.000280518	1	1	0.523836
									pKW BH	0.948953	0.993833	0.734987	0.598168	0.734987	0.598168	0.598168	0.85776	0.861437	0.85776	0.861437	0.598168	0.993833	0.598168	0.734987
									pMW 12	1	1	0.865486	1	0.615085	0.760023	1	1	1	0.96947	1	0.741843	1	0.439796	1
									pMW 13	1	1	1	0.213353	1	0.182874	0.0261248	1	1	1	1	0.626996	1	0.574746	0.626996
									pMW 23	1	1	1	0.732655	1	0.610546	0.355227	1	1	1	1	0.732655	1	1	0.355227
									log2(FC) 12	-0.332746	0.282726	0.908263	0.587131	0.759225	1.09481	0.601044	0.435477	0.93135	0.233734	0.315911	0.0263273	0.0509721	0.360005	0.000937137
									log2(FC) 13	-	-	-	-	-	-	-	-	-	-	-	-	-	-	-
									log2(FC) 23	-	-	-	-	-	-	-	-	-	-	-	-	-	-	-

## Sheet: Fused Batches
											ChoE (16:0)	ChoE (18:1)	ChoE (18:2)	ChoE (18:3)	ChoE (20:2)	ChoE (20:4)	ChoE (20:5)	ChoE (22:4)	ChoE (22:5)	ChoE (22:6)	PE(34:1)	SM(d18:1/23:0)	SM(42:3)	TG(54:1)
SampleFileName	Hospital/Institute	Hospital ID	SAMPLE.ID	SEXO	SEXO	EDAD	Batch	Group	Level	FOB (µl/l)	ChoE_03	ChoE_07	ChoE_08	ChoE_09	ChoE_10	ChoE_12	ChoE_13	ChoE_14	ChoE_15	ChoE_17	DAPE02	SphLip_23	SphLip_28	TG48
owl-1923-001	Biodonostia Health Research Institute	L95F56	CTL13	-	-	-	2	CTL	1	-	0.00372833	0.00312032	0.00064136	0.0136073	0.586558	0.000420449	0.00341202	0.0657873	0.0493999	0.0188356	1.64016	0.032692	0.00590179	0.160207
owl-1923-002	Biodonostia Health Research Institute	L76XFH/67.009.253	CTL14	F	0	24	2	CTL	1	1759	0.00498729	0.000517666	0.000202793	0.00418239	0.397455	5.67011e-06	0.000628373	0.0802513	0.0981621	0.0219973	0.761809	0.0107529	0.00218116	0.102111
owl-1923-003	Biodonostia Health Research Institute	1609455	CTL15	F	0	58	2	CTL	1	132	0.00126747	0.00100415	9.71773e-05	0.00755561	0.17091	0.000295801	0.00517665	0.0243693	0.0208731	0.0253795	4.69837	3.39456e-05	0.00333026	0.0178528
owl-1923-004	Biodonostia Health Research Institute	60.393.628/74777/2018.10	CTL16	M	1	50	2	CTL	1	111	0.00273934	0.00149299	0.000546511	0.0139459	0.22629	6.41965e-05	0.010647	0.900971	0.00792807	0.0194249	0.537104	0.0330363	0.00922127	0.0649857
owl-1923-005	Biodonostia Health Research Institute	746226	CTL17	F	0	60	2	CTL	1	215	0.00446593	0.00175077	0.000211233	0.00280868	0.0890799	0.000276704	2.78295e-06	0.0276214	0.000518984	0.0130927	0.702622	0.00100065	0.000504166	0.0220487
owl-1923-006	Biodonostia Health Research Institute	1367529	CTL18	M	1	65	2	CTL	1	2260	0.0301575	0.0653578	0.0178068	0.0185487	1.82479	0.0116017	0.0146169	4.26456	1.40787	0.106729	3.79816	0.0020438	0.00205942	0.239298
owl-1923-007	Biodonostia Health Research Institute	1794197	CTL19	F	0	68	2	CTL	1	137	0.00442845	0.00649134	0.00314046	0.0184217	0.422604	0.00241159	0.01116	0.558178	0.412446	0.0364628	3.62811	0.00144215	0.00180003	0.270729
owl-1923-008	Biodonostia Health Research Institute	499564	CTL20	M	1	70	2	CTL	1	1237	0.0134248	0.00785642	0.00613552	0.0169241	2.44801	0.00325554	0.0516403	0.317005	0.0430027	0.0646617	1.829	0.00581734	0.0123854	0.239481
owl-1923-009	Biodonostia Health Research Institute	328410	CTL21	F	0	55	2	CTL	1	456	0.00997833	0.00286844	0.00314555	0.00607801	1.29117	1.57353e-05	0.0672236	1.67056	0.730895	0.0292407	5.24774	0.000205639	0.00241076	8.14283
owl-1923-010	Biodonostia Health Research Institute	2016696	CTL22	M	1	63	2	CTL	1	142	0.000716867	0.000474639	0.000112547	0.00250403	0.0698757	0.000117734	2.56616e-05	0.000435148	0.00048548	0.00066915	0.144616	0.000366907	6.0914e-05	0.166448
owl-1923-013	Biodonostia Health Research Institute	732612	CTL25	F	0	65	2	CTL	1	169	0.00373488	0.00427558	0.000610866	0.00531074	0.233292	0.000779229	0.0423867	0.144335	0.15894	0.0387452	0.837036	0.000840262	0.00312742	0.0482888
owl-2124-001	Biodonostia Health Research Institute	985524	985524	M	1	53	3	CTL	1	294	0.00323707	0.00278182	0.00123586	0.00380406	0.710043	0.000805097	0.00440262	0.0670612	0.0671277	0.017704	0.437674	0.000541555	0.000326448	0.0751968
owl-2124-002	Biodonostia Health Research Institute	2541654	2541654	M	1	60	3	CTL	1	470	0.00861261	0.0129505	0.00324885	0.00727329	0.378917	0.00585237	0.00614405	0.580754	0.157536	0.0175937	5.65178	0.000716214	0.00177648	0.146143
owl-2124-003	Biodonostia Health Research Institute	936074	936074	M	1	69	3	CTL	1	906	0.00748343	0.00916044	0.00206149	0.00385493	0.204517	0.00360142	0.00561725	0.648837	0.214716	0.0217214	3.41115	0.00263152	0.00131401	0.0513604
owl-2124-004	Biodonostia Health Research Institute	1197371	1197371	M	1	53	3	CTL	1	525	0.0124427	0.00925677	0.00214479	0.00496215	0.211279	0.00280893	0.0124797	0.98802	0.252975	0.117121	1.66444	0.00285288	0.000691965	0.244815
owl-2124-005	Biodonostia Health Research Institute	2062885	2062885	M	1	51	3	CTL	1	274	0.0140508	0.0416275	0.0120934	0.0269755	2.51955	0.00568844	0.0101578	0.694179	0.3234	0.0472793	5.52488	0.00217141	0.00159702	0.382035
owl-2124-006	Biodonostia Health Research Institute	1210324	1210324	F	0	51	3	CTL	1	336	0.00980653	0.0106212	0.00145075	0.00686131	0.531297	0.00195395	0.00311716	0.509402	0.164627	0.0252787	0.498523	0.000431936	0.000200886	0.128676
owl-2124-007	Biodonostia Health Research Institute	529208	529208	F	0	61	3	CTL	1	106	0.00085546	0.00214881	0.00273464	0.0101276	0.549037	0.00108807	0.0189518	0.0912743	0.33803	0.0908325	0.820155	0.00236925	0.000953511	1.34473
owl-2124-008	Biodonostia Health Research Institute	961163	961163	F	0	61	3	CTL	1	142	0.00287499	0.00498018	0.00327489	0.0105749	1.06455	0.00111486	0.00667131	0.157774	0.047037	0.0362858	1.40448	0.000703068	0.000367838	2.54003
owl-2124-009	Biodonostia Health Research Institute	296225	296225	M	1	69	3	CTL	1	340	0.00337633	0.000407126	0.000143301	0.000859371	0.197627	0.000218635	0.000452727	0.000735011	0.00518984	0.00467504	0.112534	0.000811704	0.0002451	0.00954189
owl-2124-010	Biodonostia Health Research Institute	761114	761114	M	1	58	3	CTL	1	185	0.00185498	0.00256968	0.000721572	0.00230395	0.303081	0.000366782	0.000256616	0.0164308	0.000650196	0.00940889	0.384071	0.00069287	0.000298102	0.0836565
owl-2124-011	Biodonostia Health Research Institute	953867	953867	M	1	62	3	CTL	1	101	0.00929605	0.0156548	0.00416015	0.0364091	0.901533	0.0018224	0.0157362	0.84541	0.401601	0.0711475	1.68869	0.00232076	0.000623665	0.117936
owl-2124-012	Biodonostia Health Research Institute	2004875	2004875	F	0	69	3	CTL	1	526	0.00174076	0.000754748	0.000785783	0.00167079	0.0703922	0.00110059	0.00164745	0.0114523	0.000675196	0.0127715	0.481939	0.00130621	0.000910977	0.0410687
owl-2124-013	Biodonostia Health Research Institute	777110	777110	F	0	53	3	CTL	1	296	0.0125796	0.0102722	0.00361345	0.00494381	0.215608	0.00377317	0.0155486	0.169497	0.352752	0.0747214	1.08303	0.00508733	0.00400255	0.0500369
owl-2124-014	Biodonostia Health Research Institute	2038131	2038131	M	1	59	3	CTL	1	386	0.0168222	0.023382	0.00657695	0.0273741	1.00759	0.0035702	0.00482217	0.564623	0.745201	0.0330829	1.4802	0.00357936	0.00113508	0.0321671
owl-2124-015	Biodonostia Health Research Institute	1846118	1846118	F	0	53	3	CTL	1	9026	0.0144562	0.0169291	0.00305672	0.00468347	0.880314	0.00429884	0.0110596	0.284628	0.144855	0.0404045	1.94699	0.000636713	0.00170666	0.101845
owl-2124-016	Biodonostia Health Research Institute	1924444	1924444	M	1	57	3	CTL	1	131	0.000680276	0.00171633	0.000535181	0.00242746	0.232665	0.000883321	0.00103341	0.100908	0.0564454	0.0248614	1.40033	0.00171694	0.00133686	0.0907637
owl-2124-017	Biodonostia Health Research Institute	987992	987992	F	0	54	3	CTL	1	333	0.00186139	0.000651959	0.00082889	0.000809233	0.80373	0.00240314	0.0226505	0.626267	0.38132	0.143789	4.23586	0.0221962	0.000961972	0.273554
owl-2124-018	Biodonostia Health Research Institute	1195060	1195060	M	1	54	3	CTL	1	574	0.00949862	0.0109451	0.00173713	0.00357965	0.283878	0.00494565	0.113126	4.44067	0.997499	0.607587	2.0412	0.00102485	0.00115784	0.338967
owl-2124-019	Biodonostia Health Research Institute	536115	536115	M	1	59	3	CTL	1	723	0.00538772	0.00774606	0.00152862	0.00982812	0.50844	0.000655967	0.0033537	0.174533	0.10337	0.0232564	8.03221	0.00204645	0.00155675	0.0517289
owl-2124-020	Biodonostia Health Research Institute	558504	558504	F	0	53	3	CTL	1	356	0.00680883	0.0229244	0.00231585	0.00969859	0.282784	0.00482179	0.00998781	0.319686	0.532807	0.0208025	13.5966	0.0274478	0.00591501	0.111931
owl-2124-021	Biodonostia Health Research Institute	1386673	1386673	F	0	61	3	CTL	1	1356	0.00905939	0.011836	0.00218173	0.0062936	11.7967	0.00247048	0.00530542	0.233937	0.0514348	0.0561746	2.05453	0.0015663	0.000742612	0.04844
owl-2124-022	Biodonostia Health Research Institute	97455	97455	F	0	64	3	CTL	1	203	0.00171951	0.00311818	0.00376672	0.00532066	0.371094	0.000966845	0.0423942	0.019439	0.0748095	0.0410204	1.01756	0.00181612	0.00125928	0.842936
owl-2124-023	Biodonostia Health Research Institute	92079	92079	F	0	66	3	CTL	1	104	0.0028583	0.00644454	0.00188451	0.00346368	1.05585	0.000919494	0.0100988	0.922143	0.490213	0.0095941	4.30063	0.00027227	0.000673135	0.299961
owl-2124-024	Biodonostia Health Research Institute	966024	966024	F	0	59	3	CTL	1	405	0.00528957	0.00546949	0.000841867	0.00285074	0.121369	0.000879457	0.00192357	0.190944	0.169196	0.0201105	0.576752	0.000391545	0.000334544	0.0363537
owl-2124-025	Biodonostia Health Research Institute	1810325	1810325	M	1	62	3	CTL	1	131	0.0133812	0.00845631	0.00184481	0.0058589	0.736377	0.00227621	0.00897428	0.703581	0.188431	0.0297115	2.95302	0.00278693	0.000716018	0.0682494
owl-2124-026	Biodonostia Health Research Institute	991615	991615	M	1	58	3	CTL	1	718	0.00145437	0.00113462	0.000342288	0.00158732	0.128785	0.000766228	0.0155018	0.0359216	0.0206309	0.0476737	0.643718	0.000258557	0.00087497	0.275391
owl-2124-027	Biodonostia Health Research Institute	10831001	10831001	M	1	68	3	CTL	1	181	0.00450648	0.0061313	0.00138781	0.00728459	6.63461	0.00231777	0.00285654	0.461812	0.164146	0.0143842	3.7533	0.000610664	0.00174639	0.116958
owl-2124-028	Biodonostia Health Research Institute	1594901	1594901	F	0	63	3	CTL	1	135	0.00540308	0.00599626	0.00139728	0.00277004	0.0684614	0.00151937	0.0253998	1.34161	0.950751	0.229032	2.17536	0.000787768	0.000538068	0.0453491
owl-2124-029	Biodonostia Health Research Institute	743863	743863	F	0	63	3	CTL	1	115	0.00809119	0.0107681	0.00246927	0.00361244	0.566514	0.00279673	0.00803576	0.314425	0.103005	0.0234209	2.60954	0.000547739	0.000585318	0.102941
owl-2124-030	Biodonostia Health Research Institute	2338596	2338596	F	0	67	3	CTL	1	123	0.00404389	0.00172862	0.000486246	0.00422189	0.361457	0.00014502	0.00176023	0.000680151	0.0212959	0.00787609	1.34574	0.00117424	0.00059243	0.104561
owl-2124-031	Biodonostia Health Research Institute	2013402	2013402	M	1	67	3	CTL	1	163	0.00533687	0.0077333	0.00438984	0.0106189	1.54438	0.00391642	0.123651	1.399	1.61026	0.14108	4.5667	0.00379676	0.00224503	2.59774
owl-2124-032	Biodonostia Health Research Institute	1799022	1799022	F	0	66	3	CTL	1	265	0.00447517	0.00711425	0.00187444	0.0081386	0.560906	0.00149571	0.00753185	0.151061	0.0619112	0.0385666	4.63639	0.00214557	0.00170373	0.0868591
owl-2124-033	Biodonostia Health Research Institute	2005708	2005708	M	1	70	3	CTL	1	160	0.0107276	0.017009	0.0112198	0.0130922	1.26694	0.00166916	0.00317359	0.266944	0.0829191	0.0306752	2.09885	0.00200515	0.00186989	0.495949
owl-2124-034	Biodonostia Health Research Institute	1390400	1390400	F	0	61	3	CTL	1	133	0.00129164	0.00202113	0.000612584	0.00175367	0.458954	0.000375067	0.00218009	0.0434871	0.0390466	0.00826488	1.36116	0.00028596	0.000149291	0.104435
owl-2124-035	Biodonostia Health Research Institute	10186169	10186169	F	0	54	3	CTL	1	128	0.0147781	0.0221524	0.0085476	0.00864384	4.46385	0.00251111	0.00251624	0.255285	0.182771	0.0270897	1.22492	0.00394018	0.00120521	0.146999
owl-2124-036	Biodonostia Health Research Institute	732528	732528	M	1	66	3	CTL	1	217	0.00226807	0.00392693	0.00166929	0.00787906	2.09923	0.000260263	0.00422118	0.0736906	0.0255531	0.0277439	3.09462	0.0101152	0.00276777	3.87841
owl-2124-037	Biodonostia Health Research Institute	1823761	1823761	M	1	60	3	CTL	1	143	0.0224542	0.0459756	0.026753	0.0137282	1.6162	0.0102375	0.233224	3.65928	2.93457	0.102523	42.3722	0.00162632	0.000429868	1.85106
owl-2124-038	Biodonostia Health Research Institute	1161733	1161733	F	0	65	3	CTL	1	3368	0.00444637	0.00243967	0.000744263	0.00174262	0.0232645	0.00136528	0.0039592	0.0103487	0.0130832	0.0118533	0.400663	0.000196374	9.18905e-05	0.017479
owl-2124-039	Biodonostia Health Research Institute	951519	951519	F	0	65	3	CTL	1	400	0.00381887	0.00383181	0.000694082	0.00156603	0.190263	0.000695505	0.00346722	0.108797	0.027813	0.027558	0.236611	0.000105424	0.00108333	0.0296917
owl-2124-040	Biodonostia Health Research Institute	307866	307866	F	0	65	3	CTL	1	256	0.00228697	0.00123868	0.000498333	0.00245848	0.425109	0.000301665	0.000826488	0.037771	0.0125057	0.0030613	0.141013	0.000738649	0.000405141	0.339852
owl-2124-041	Biodonostia Health Research Institute	298343	298343	M	1	68	3	CTL	1	199	0.00919977	0.00764706	0.0020342	0.00802002	0.526676	0.00191165	0.00541355	0.300191	0.0795204	0.044403	4.1863	0.0010365	0.000692464	0.0704659
owl-2124-042	Biodonostia Health Research Institute	1282048	1282048	F	0	67	3	CTL	1	234	0.00480049	0.00464913	0.000757326	0.00239329	0.232526	0.00133891	0.028572	0.595929	0.273942	0.152618	7.4427	0.00403466	0.00192919	0.0568405
owl-2124-043	Biodonostia Health Research Institute	977191	977191	F	0	57	3	CTL	1	202	0.00400271	0.00211334	0.000512134	0.0016066	0.0296729	0.000861943	0.00121089	0.0498849	0.0232835	0.0119251	1.13574	0.00190852	0.000558691	0.11742
owl-2124-044	Biodonostia Health Research Institute	1807652	1807652	F	0	65	3	CTL	1	385	0.00970228	0.00638692	0.00381678	0.00443544	0.61282	0.0031398	0.00243446	0.202007	0.0612735	0.00846893	12.3272	0.00100074	0.0010067	0.263501
owl-2124-045	Biodonostia Health Research Institute	1630987	1630987	M	1	54	3	CTL	1	320	0.00416932	0.00240303	0.00130827	0.00399138	0.196391	0.00239866	0.00789909	0.116735	0.0767498	0.0210329	1.2059	0.00202471	0.000346367	0.208031
owl-2124-046	Biodonostia Health Research Institute	2006704	2006704	F	0	70	3	CTL	1	127	0.0128411	0.0161955	0.00341397	0.0115949	0.362016	0.00490906	0.0946409	1.27861	1.40748	0.283633	3.83585	0.000128154	0.00048447	0.178948
owl-2124-047	Biodonostia Health Research Institute	1812171	1812171	F	0	63	3	CTL	1	416	0.00192978	0.00379281	0.00164059	0.00705733	0.463285	0.00123806	0.0179501	0.130707	0.11671	0.0288476	1.06657	0.00192857	0.0014697	0.304473
owl-2124-048	Biodonostia Health Research Institute	2036694	2036694	M	1	60	3	CTL	1	293	0.00425908	0.00499549	0.00159536	0.00431374	0.227404	0.00196553	0.0091973	0.0737991	0.0842253	0.0406142	1.02119	0.00520084	0.000968399	0.379899
owl-2124-049	Biodonostia Health Research Institute	79846	79846	F	0	70	3	CTL	1	6360	0.00480033	0.00473946	0.00206519	0.00270516	0.117111	0.00487926	0.0132417	0.175926	0.122596	0.0316006	0.610361	0.00470772	0.00363612	0.182031
owl-2124-050	Biodonostia Health Research Institute	11948655	11948655	M	1	52	3	CTL	1	138	0.00104311	0.001082	0.000249216	0.00397583	0.0729149	0.000230492	2.78295e-05	0.0146279	0.0048548	0.00480024	0.50112	0.00129774	0.000573411	0.0290729
owl-2124-051	Biodonostia Health Research Institute	1389134	1389134	F	0	62	3	CTL	1	581	0.00631834	0.00375017	0.000823785	0.000936043	1.2614	0.000323666	0.000299974	0.00435148	0.00650196	0.00693277	3.0711	0.000296909	0.000233399	0.126872
owl-1923-016	Biodonostia Health Research Institute	506393	AD21	M	1	64	2	AD	2	143	0.00402864	0.000519495	9.59688e-05	0.00374832	0.123529	6.73114e-05	5.5659e-05	0.0201247	0.000792807	0.00666331	0.600758	0.00402859	0.00111016	0.0341465
owl-1923-017	Biodonostia Health Research Institute	1613275	AD22	F	0	56	2	AD	2	1472	0.0184281	0.0253087	0.00747832	0.0172494	1.77903	0.00123669	0.0409639	1.60402	0.36917	0.0469561	3.17003	0.00346048	0.00209189	0.657168
owl-1923-018	Biodonostia Health Research Institute	91276	AD23	M	1	63	2	AD	2	399	0.00283476	0.00327449	0.000652396	0.00582908	0.563966	0.000589122	0.00415481	0.207512	0.0829084	0.0209443	10.3495	0.000429344	0.00222307	0.131093
owl-1923-019	Biodonostia Health Research Institute	1710056	AD24	M	1	62	2	AD	2	101	0.00788799	0.00614474	0.00190136	0.0197199	1.52826	0.00239344	0.0935709	0.431375	0.267305	0.277485	1.96424	0.000951537	0.00524338	0.0579409
owl-1923-020	Biodonostia Health Research Institute	11220077	AD25	M	1	55	2	AD	2	100	0.00696045	0.0104798	0.00229094	0.0115952	5.90963	0.000195692	0.00175996	0.57033	0.118313	0.0141692	4.84726	0.0117267	0.00693772	0.633457
owl-1923-021	Biodonostia Health Research Institute	524047	AD26	M	1	61	2	AD	2	190	0.0078851	0.00697936	0.00107239	0.00557741	0.328135	0.00135672	0.00166509	0.618942	0.231337	0.0267125	0.78137	0.0024433	0.00198213	0.081167
owl-1923-022	Biodonostia Health Research Institute	1387765	AD27	F	0	59	2	AD	2	182	0.00524904	0.00799538	0.000919976	0.0087988	0.713559	0.00134332	0.0598745	0.0762489	0.119854	0.277639	1.83848	0.00102654	0.00544804	0.0367495
owl-1923-023	Biodonostia Health Research Institute	336981	AD28	M	1	53	2	AD	2	156	0.00841241	0.00379573	0.000404112	0.00329702	0.145292	0.000434893	0.00155179	0.214684	0.0372091	0.0144326	3.82235	0.00152806	0.0010003	0.0583842
owl-1923-024	Biodonostia Health Research Institute	2356940	AD29	M	1	53	2	AD	2	263	0.000529225	0.00267785	0.00102259	0.00229699	1.00199	0.000120394	0.0478961	0.186747	0.0335143	0.0400816	3.44977	0.00196667	0.000417792	1.69851
owl-1923-025	Biodonostia Health Research Institute	2281737	AD30	M	1	64	2	AD	2	180	0.0180597	0.0158015	0.00270282	0.0119184	0.341646	0.00325659	0.00962368	2.39304	0.606309	0.054009	2.37738	0.000504515	0.00155843	0.679114
owl-1923-026	Biodonostia Health Research Institute	955419	AD31	M	1	60	2	AD	2	1374	0.00384145	0.00288665	0.000321324	0.00344007	0.065688	0.000545994	0.0065023	0.126065	0.09685	0.0315302	1.48427	0.00120347	0.00222732	0.0927254
owl-2124-052	Biodonostia Health Research Institute	1163098	1163098	F	0	64	3	AD	2	178	0.0345671	0.136995	0.0220492	0.0315863	1.92192	0.0317999	0.273258	8.14135	3.48409	0.519712	0.880993	0.000491736	4.87395e-13	0.115682
owl-2124-053	Biodonostia Health Research Institute	2263651	2263651	M	1	50	3	AD	2	220	0.00667241	0.00845089	0.00172929	0.00643219	0.891419	0.0014365	0.00796223	0.212171	0.137086	0.056762	5.39937	0.000971198	0.000666849	0.0885913
owl-2124-054	Biodonostia Health Research Institute	1592587	1592587	F	0	64	3	AD	2	435	0.00154996	0.00540287	0.00279034	0.0416714	23.3066	0.00498759	0.0423727	0.34394	0.536669	0.298741	1.04347	0.000392517	0.0036497	1.63149
owl-2124-055	Biodonostia Health Research Institute	776406	776406	M	1	53	3	AD	2	307	0.00791836	0.00825863	0.0032509	0.0187409	0.85014	0.00235518	0.00712807	0.462529	0.0961387	0.050445	0.611988	0.00318711	0.00102142	0.117543
owl-2124-056	Biodonostia Health Research Institute	1360956	1360956	F	0	71	3	AD	2	258	0.0188316	0.0351226	0.00662806	0.0255038	1.94832	0.00236632	0.0148648	0.908897	0.307501	0.056542	1.30798	0.00264471	0.00216911	0.0802025
owl-2124-057	Biodonostia Health Research Institute	1497237	1497237	F	0	50	3	AD	2	106	0.000781879	0.00122381	0.000479969	0.000688366	0.128808	0.000293634	2.99974e-05	0.000870295	0.00675196	0.00301029	1.42695	0.000954579	0.000414423	0.203428
owl-2124-058	Biodonostia Health Research Institute	1367640	1367640	F	0	69	3	AD	2	293	0.00294455	0.00504399	0.00487072	0.00880532	1.90934	0.00242087	0.045458	1.33667	0.596316	0.0235222	5.1623	0.000386285	0.000189333	6.59055
owl-2124-059	Biodonostia Health Research Institute	940202	940202	F	0	67	3	AD	2	228	0.0396072	0.0805585	0.0228049	0.0381785	2.95444	0.0114828	0.105586	14.9793	2.4854	0.174975	0.882916	0.0167145	0.00129978	0.383452
owl-2124-060	Biodonostia Health Research Institute	1610352	1610352	F	0	58	3	AD	2	207	0.00618064	0.00247086	0.000555026	0.00138324	0.0360931	0.000723449	0.00147952	0.0011153	0.00962734	0.00792708	0.340924	0.00299172	0.000314801	0.0121481
owl-2124-061	Biodonostia Health Research Institute	82884	82884	F	0	69	3	AD	2	396	0.00798605	0.00783811	0.00123388	0.00364341	0.211761	0.00206125	0.00389949	0.397954	0.158706	0.029673	1.4312	0.000362149	0.000238779	0.0607593
owl-2124-062	Biodonostia Health Research Institute	972161	972161	M	1	58	3	AD	2	189	0.007385	0.0143824	0.00246365	0.00927295	1.36828	0.0015863	0.00804962	0.250734	0.273224	0.0198908	11.1959	0.00037927	0.0018386	0.519225
owl-2124-063	Biodonostia Health Research Institute	727296	727296	M	1	67	3	AD	2	515	0.00465466	0.00602885	0.000908296	0.0018684	0.0858923	0.00164775	0.0113903	0.725188	0.300324	0.0763556	6.41054	0.0034069	0.00187944	0.152453
owl-2124-064	Biodonostia Health Research Institute	310459	310459	M	1	64	3	AD	2	319	0.00477685	0.00442939	0.00132591	0.00146836	0.187547	0.00202406	0.000497752	0.234591	0.0738654	0.00931171	6.29861	0.000478735	0.000477046	0.292134
owl-2124-065	Biodonostia Health Research Institute	302623	302623	M	1	67	3	AD	2	949	0.00540621	0.0074512	0.00191073	0.00467261	0.240607	0.00313608	0.058436	0.34166	0.413798	0.131351	0.876089	0.000330714	0.000767707	0.0843619
owl-2124-066	Biodonostia Health Research Institute	2037554	2037554	M	1	58	3	AD	2	266	0.00262371	0.0030906	0.000768844	0.00179132	0.131203	0.000627281	0.00416111	0.0709882	0.0705562	0.0120733	1.79987	0.00162941	9.15456e-05	0.0528287
owl-2124-067	Biodonostia Health Research Institute	2021830	2021830	M	1	63	3	AD	2	227	0.0121636	0.0122726	0.00230357	0.00601959	0.184972	0.00374991	0.0109016	1.19997	0.3913	0.0534833	1.08601	0.00118174	0.001096	0.0395773
owl-2124-068	Biodonostia Health Research Institute	2032652	2032652	M	1	59	3	AD	2	290	0.0144528	0.035347	0.0151746	0.0195272	1.94862	0.00802151	0.0833121	1.25656	0.705693	0.127528	6.27863	0.0021825	0.00296724	0.667818
owl-2124-069	Biodonostia Health Research Institute	962486	962486	M	1	61	3	AD	2	290	0.00512067	0.0121735	0.00337566	0.0119153	1.05672	0.00281124	0.00815301	0.226179	0.0906645	0.0240891	1.92461	0.00153363	0.000889055	0.255705
owl-2124-070	Biodonostia Health Research Institute	972267	972267	M	1	57	3	AD	2	290	0.00864469	0.0171359	0.00967272	0.011265	0.863433	0.00960419	0.0210169	1.56184	0.634824	0.0347007	2.95319	0.000503653	0.000806353	0.0581108
owl-2124-071	Biodonostia Health Research Institute	1376052	1376052	M	1	65	3	AD	2	195	0.00251607	0.00600608	0.00407431	0.0103255	1.13249	0.00123109	0.0701823	0.181566	0.172161	0.226004	9.85599	0.00429126	0.00178272	1.30876
owl-2124-072	Biodonostia Health Research Institute	508869	508869	M	1	70	3	AD	2	982	0.00740049	0.0042928	0.0015439	0.00250863	0.0145026	0.00223743	0.00490312	0.0420016	0.129754	0.0169266	1.32855	0.00213641	0.00285707	0.0421236
owl-2124-073	Biodonostia Health Research Institute	745235	745235	F	0	61	3	AD	2	110	0.00625844	0.00880113	0.00200882	0.0098766	37.2306	0.00171035	0.00303329	0.268236	0.113921	0.030996	1.71434	0.000669355	0.000491647	0.089027
owl-2124-074	Biodonostia Health Research Institute	2137670	2137670	F	0	67	3	AD	2	589	0.0065446	0.00341784	0.000802199	0.00139572	0.30277	0.000397275	0.00395613	0.219282	0.203987	0.0237635	0.975544	0.000389448	0.00101037	0.0952776
owl-2124-075	Biodonostia Health Research Institute	536016	536016	M	1	61	3	AD	2	499	0.0146887	0.0283962	0.00460663	0.00928749	0.686216	0.00605945	0.00937714	0.576793	0.208036	0.0481315	21.7299	0.0096703	0.00370466	0.112136
owl-2124-076	Biodonostia Health Research Institute	348275	348275	F	0	52	3	AD	2	809	0.027298	0.0561037	0.0166427	0.0350224	1.31903	0.00789269	0.02313	0.810141	0.149588	0.0622367	6.1838	0.016718	0.00748331	0.0515892
owl-2124-077	Biodonostia Health Research Institute	991383	991383	M	1	53	3	AD	2	193	0.00297038	0.00304945	0.0007361	0.00448479	0.351546	0.000935558	0.00930811	0.156204	0.64206	0.073802	1.18007	0.000975766	0.000349493	0.0694954
owl-2124-078	Biodonostia Health Research Institute	1598550	1598550	M	1	63	3	AD	2	109	0.000734269	0.00126016	0.000472914	0.00153805	0.302269	0.000333985	0.00348048	0.02977	0.0213486	0.0195692	1.55438	0.0011429	0.00124769	0.0649036
owl-2124-079	Biodonostia Health Research Institute	562444	562444	F	0	51	3	AD	2	173	0.00424912	0.0160076	0.00256415	0.00292326	0.388664	0.00102389	0.00545168	0.463187	0.138199	0.0257979	3.17309	0.000288504	0.00125366	0.0266364
owl-2124-080	Biodonostia Health Research Institute	1603525	1603525	F	0	61	3	AD	2	181	0.00448027	0.00780658	0.00207838	0.00643145	1.89196	0.00086616	0.00163141	0.360056	0.11493	0.0207307	6.35266	0.00254897	0.000730843	0.10932
owl-2124-081	Biodonostia Health Research Institute	2020954	2020954	F	0	65	3	AD	2	194	0.0023403	0.00258352	0.00117018	0.00341041	0.378415	0.000936717	0.00838626	0.0268174	0.032249	0.0240341	3.09471	0.00122271	0.00059244	0.13343
owl-2124-082	Biodonostia Health Research Institute	1362261	1362261	M	1	71	3	AD	2	867	0.0141317	0.0596797	0.0152627	0.0364676	1.74456	0.0061431	0.0367602	3.01973	0.900456	0.0936543	2.40488	0.00238305	0.00151119	0.137016
owl-2124-083	Biodonostia Health Research Institute	1596081	1596081	M	1	64	3	AD	2	194	0.00360322	0.0115121	0.00618851	0.0278017	1.28099	0.0013435	0.0260577	0.229856	0.050228	0.0428717	5.71008	0.00361711	0.00261501	1.46672
owl-2124-084	Biodonostia Health Research Institute	91943	91943	F	0	66	3	AD	2	8223	0.00597911	0.00801261	0.0115497	0.0258999	1.06935	0.00887299	0.154932	0.140008	0.571766	0.512889	3.44803	0.00193735	0.00229185	0.174744
owl-2124-085	Biodonostia Health Research Institute	1386138	1386138	M	1	63	3	AD	2	308	0.00607145	0.00860198	0.00152446	0.00546456	1.64645	0.00139335	0.0134661	0.161346	0.135889	0.0982262	3.37157	0.00365721	0.00175046	0.370523
owl-2124-086	Biodonostia Health Research Institute	1794076	1794076	F	0	69	3	AD	2	128	0.00168928	0.00221797	0.000582224	0.00122148	0.3155	0.000555923	0.000554975	0.111281	0.0431345	0.0101161	7.78353	0.000311335	0.00100964	0.114882
owl-2124-087	Biodonostia Health Research Institute	956378	956378	M	1	63	3	AD	2	128	0.00369907	0.00920317	0.00194187	0.00598231	1.248	0.00342357	0.00766369	0.444333	0.202609	0.0500169	1.38835	0.000456606	0.000768799	0.087208
owl-2124-088	Biodonostia Health Research Institute	131056	131056	F	0	54	3	AD	2	176	0.0011679	0.000678606	0.000249074	0.00117314	0.111916	0.000159956	0.00416456	0.0469296	0.000962734	0.0343586	0.61844	0.000530818	0.000155073	0.113484
owl-2124-089	Biodonostia Health Research Institute	737169	737169	M	1	65	3	AD	2	161	0.00263941	0.00462207	0.000684054	0.00378407	0.771966	0.000859415	0.00338072	0.130994	0.0821372	0.0105764	3.84219	0.00331019	0.00161318	0.0573031
owl-2124-090	Biodonostia Health Research Institute	1632217	1632217	F	0	53	3	AD	2	107	0.00144311	0.00363261	0.00146179	0.00800504	0.590231	0.000937332	0.000860299	0.0246874	0.0395738	0.0100721	1.80505	8.51868e-05	0.00107205	0.0926968
owl-2124-091	Biodonostia Health Research Institute	939523	939523	F	0	69	3	AD	2	148	0.00156743	0.00255331	0.000694474	0.00449667	0.660806	0.000864123	0.00175309	0.0632601	0.172008	0.00867442	1.87737	0.0131147	0.00345798	0.342467
owl-2124-092	Biodonostia Health Research Institute	2019369	2019369	F	0	65	3	AD	2	1445	0.00132273	0.00112577	0.000946037	0.00489126	0.308788	0.000479104	0.00489935	0.0227166	0.0262766	0.0297799	0.930451	0.00190965	0.00226052	0.0755772
owl-2124-093	Biodonostia Health Research Institute	1384376	1384376	M	1	63	3	AD	2	218	0.00384402	0.00149005	0.00042684	0.00103464	0.152795	0.00102101	0.000561725	0.0313023	0.0127809	0.00502263	0.228257	0.00169757	0.000610883	0.0502701
owl-2124-094	Biodonostia Health Research Institute	1797978	1797978	M	1	68	3	AD	2	1287	0.0115196	0.00917173	0.00356909	0.0103897	0.357262	0.00235999	0.0264103	0.188967	0.149049	0.0506114	5.26694	0.00706211	0.00237544	0.089263
owl-2124-095	Biodonostia Health Research Institute	1812253	1812253	M	1	63	3	AD	2	248	0.0262308	0.0622336	0.00675972	0.0405739	0.279226	0.00523307	0.00616861	0.685599	0.204532	0.0155531	2.47394	0.00662392	0.00194586	0.468563
owl-2124-096	Biodonostia Health Research Institute	10340501	10340501	F	0	69	3	AD	2	178	0.00236891	0.00210261	0.00078297	0.00333549	0.312861	0.00063562	0.00125606	0.079774	0.0335149	0.010465	0.63101	0.00051466	0.00108524	0.176501
owl-1923-031	Biodonostia Health Research Institute	2044462	CRC11	M	1	55	2	CRC	3	2330	0.00177775	0.00337521	0.00216839	0.0069304	0.90537	0.00128204	0.00730892	0.138915	0.0866838	0.0262687	1.17312	0.00131084	0.00235577	0.103593
owl-1923-032	Biodonostia Health Research Institute	955326	CRC12	F	0	60	2	CRC	3	1739	0.00566629	0.00356996	0.00197198	0.00707069	0.946199	0.00145103	0.00613431	0.0268266	0.105386	0.0177611	0.590309	0.000799797	0.001588	0.156446
owl-1923-033	Biodonostia Health Research Institute	772722	CRC13	M	1	50	2	CRC	3	254	0.00918082	0.0161781	0.00288265	0.0148071	0.348438	0.0140809	0.77939	3.13459	6.11143	0.761452	2.47009	0.0228612	0.00340591	0.232137
owl-1923-034	Biodonostia Health Research Institute	1147508	CRC14	F	0	65	2	CRC	3	1492	0.00283961	0.00154764	0.000522685	0.00315202	0.00145026	0.00127757	0.00310724	0.000680151	0.0132092	0.0307698	0.223909	0.00151313	0.00101414	0.0166346
owl-1923-036	Biodonostia Health Research Institute	1366383	CRC17	F	0	66	2	CRC	3	1226	0.00931713	0.0107082	0.00474331	0.00826002	1.05579	0.00560649	0.0359627	0.0990461	0.0404283	0.0583381	4.50211	0.00598587	0.0107123	0.0527275
owl-1923-037	Biodonostia Health Research Institute	294533	CRC18	M	1	67	2	CRC	3	1287	0.00228924	0.00219604	0.00145447	0.00814551	0.194677	0.000349814	0.00210357	0.184281	0.13183	0.0125851	3.07463	0.00532811	0.00336851	0.077283
owl-1923-038	Biodonostia Health Research Institute	77259	CRC19	M	1	67	2	CRC	3	2912	0.0113433	0.0141894	0.00374863	0.0129322	0.214263	0.00887716	0.0257213	0.933664	0.34326	0.0389216	2.26152	0.00856784	0.00843982	0.196887
owl-1923-039	Biodonostia Health Research Institute	502203	CRC20	M	1	69	2	CRC	3	2120	0.00761244	0.00670405	0.00815869	0.00796232	0.768985	0.00681033	0.0380767	0.138901	0.107927	0.0692866	2.76448	0.000288977	0.00110153	0.12241
owl-1923-040	Biodonostia Health Research Institute	547162	CRC21	M	1	54	2	CRC	3	3819	0.0104202	0.00796827	0.00293792	0.00508142	1.16691	0.000660686	0.00361144	0.145599	0.0199888	0.0315144	1.05079	0.000743646	0.000459254	0.0612635
owl-1923-041	Biodonostia Health Research Institute	1404652	CRC22	F	0	54	2	CRC	3	4943	0.010489	0.00948422	0.01051	0.019369	0.87181	0.00711896	0.055521	0.214048	0.182663	0.0627423	1.78468	0.00682753	0.00986788	0.156006
owl-1923-042	Biodonostia Health Research Institute	90555	CRC23	F	0	62	2	CRC	3	471	0.00769533	0.0073329	0.00320443	0.00607544	0.369238	0.00244348	0.0299907	0.0672698	0.0504976	0.0295406	1.03071	0.00320106	0.00328341	0.067059
owl-2124-097	Biodonostia Health Research Institute	291883	291883	F	0	71	3	CRC	3	170	0.00217833	0.00564647	0.0041197	0.000778098	1.01497	0.00583973	0.020166	0.0896565	0.0433216	0.0217989	39.5551	0.00492	0.00135194	0.179588
owl-2124-098	Biodonostia Health Research Institute	1791376	1791376	M	1	69	3	CRC	3	749	0.0130224	0.0196689	0.00650744	0.0139617	16.2904	0.00738914	0.00636248	2.18405	0.354413	0.048659	2.0826	0.000444805	0.00184127	2.35499
									pnom 12	0.001	0.001	0.001	0.001	0.001	0.001	0.001	0.001	0.001	0.001	0.001	0.001	0.001	0.001	0.001
									pnorm 13	0.001	0.001	0.001	0.001	0.001	0.001	0.001	0.001	0.001	0.001	0.001	0.001	0.001	0.001	0.001
									pnorm 23	0.5	0.306902	0.5	0.249429	0.0469716	0.001	0.252203	0.001	0.001	0.001	0.001	0.001	0.0622993	0.0014228	0.001
									pANOVA BH	0.00592615	0.686473	0.442725	0.686473	0.378053	0.686473	0.232869	0.232869	0.686473	0.686473	0.686473	0.686473	0.686473	0.0560313	0.819626
									pttest 12	1	0.965314	0.205287	0.874638	0.105934	0.612776	0.769317	1	0.84551	1	1	1	1	1	1
									pttest 13	0.0143314	1	1	1	1	1	0.0489102	0.0351109	1	0.526291	0.779319	1	1	0.00361822	1
									pttest 23	0.00448156	1	0.754368	1	1	1	0.258494	0.0763694	1	0.646227	1	1	0.776016	0.00621651	1
									pKW BH	0.000250821	0.721635	0.550612	0.251809	0.550612	0.58641	0.251809	0.550612	0.588936	0.588936	0.58641	0.550612	0.58641	0.162484	0.972306
									pMW 12	1	1	0.384694	1	0.814568	0.68799	1	1	1	0.779819	1	0.345563	1	0.627255	1
									pMW 13	0.000203445	1	0.863877	0.038405	0.329014	1	0.038405	0.229425	1	1	0.737095	1	0.471345	0.011211	1
									pMW 23	7.38562e-05	1	1	0.185199	1	1	0.132903	0.890909	0.91242	1	1	1	0.60788	0.0589219	1
									log2(FC) 12	-0.393827	0.24459	0.75259	0.396468	0.566329	1.03287	0.44638	0.423135	0.697013	0.112815	0.430616	0.0965792	-0.390644	0.0753574	-0.290634
									log2(FC) 13	1.44197	0.111882	-0.0470898	0.498208	0.270482	0.984437	1.18983	2.0564	0.109761	1.03239	0.785095	0.593932	0.391815	1.1902	-0.691823
									log2(FC) 23	1.83579	-0.132708	-0.79968	0.10174	-0.295848	-0.0484356	0.743449	1.63326	-0.587252	0.919576	0.354479	0.497353	0.782459	1.11485	-0.401188
